# Supplementary material for: Study protocol for a randomised controlled trial assessing the impact of pulmonary rehabilitation on maximal exercise capacity for adults living with post-TB lung disease: Global RECHARGE Uganda
Source: PubMed Central journal article supplement (PMC8356159; doi:10.1136/bmjopen-2020-047641), 2021-08-10
Supplement: bmjopen-2020-047641.draft_revisions.pdf [file bmjopen-2020-047641.draft_revisions.pdf]

# BMJ Open

BMJ Open is committed to open peer review. As part of this commitment we make the peer review history of every article we publish publicly available.

When an article is published we post the peer reviewers' comments and the authors' responses online. We also post the versions of the paper that were used during peer review. These are the versions that the peer review comments apply to.

The versions of the paper that follow are the versions that were submitted during the peer review process. They are not the versions of record or the final published versions. They should not be cited or distributed as the published version of this manuscript.

BMJ Open is an open access journal and the full, final, typeset and author-corrected version of record of the manuscript is available on our site with no access controls, subscription charges or pay-per-view fees (<http://bmjopen.bmj.com>).

If you have any questions on BMJ Open's open peer review process please email [info.bmjopen@bmj.com](mailto:info.bmjopen@bmj.com)

# BMJ Open

## A study protocol for a randomised controlled trial assessing the impact of Pulmonary Rehabilitation on maximal exercise capacity for adults living with Post-TB lung disease: Global RECHARGE Uganda

|                               |                                                                                                                                                                                                                                                                                                                                                                                                                                                                                                                                                                                                                                                                                                                                                                                                                                                                                                                                                                                                                                                                                                                                      |
|-------------------------------|--------------------------------------------------------------------------------------------------------------------------------------------------------------------------------------------------------------------------------------------------------------------------------------------------------------------------------------------------------------------------------------------------------------------------------------------------------------------------------------------------------------------------------------------------------------------------------------------------------------------------------------------------------------------------------------------------------------------------------------------------------------------------------------------------------------------------------------------------------------------------------------------------------------------------------------------------------------------------------------------------------------------------------------------------------------------------------------------------------------------------------------|
| Journal:                      | <i>BMJ Open</i>                                                                                                                                                                                                                                                                                                                                                                                                                                                                                                                                                                                                                                                                                                                                                                                                                                                                                                                                                                                                                                                                                                                      |
| Manuscript ID                 | bmjopen-2020-047641                                                                                                                                                                                                                                                                                                                                                                                                                                                                                                                                                                                                                                                                                                                                                                                                                                                                                                                                                                                                                                                                                                                  |
| Article Type:                 | Protocol                                                                                                                                                                                                                                                                                                                                                                                                                                                                                                                                                                                                                                                                                                                                                                                                                                                                                                                                                                                                                                                                                                                             |
| Date Submitted by the Author: | 07-Dec-2020                                                                                                                                                                                                                                                                                                                                                                                                                                                                                                                                                                                                                                                                                                                                                                                                                                                                                                                                                                                                                                                                                                                          |
| Complete List of Authors:     | Katagira, Winceslaus; Makerere University, Lung Institute<br>Orme, Mark; University of Leicester, Respiratory Sciences<br>Jones, Amy; University of Leicester, Respiratory Sciences<br>Kasiita, Richard; Mulago Hospital, Kampala, Uganda, Department of Physiotherapy,<br>Rupert, Jones; University of Plymouth (UK), Faculty of Health<br>Barton, Andy; University of Plymouth (UK), Faculty of Health<br>Miah, Ruhme ; University of Leicester, Department of Respiratory Sciences<br>Manise, Adrian ; University of Leicester, Department of Respiratory Sciences<br>Matheson, Jesse; University of Sheffield, Department of Economics<br>Free, Robert; Centre for Exercise and Rehabilitation Science (CERS), NIHR Leicester Biomedical Research Centre – Respiratory, University Hospitals of Leicester NHS Trust<br>Steiner, michael ; Institute for Lung Health, NIHR Leicester Biomedical Research Centre – Respiratory, University of Leicester, Glenfield Hospital,<br>Kirenga, Bruce; Makerere University, Lung Institute<br>Singh, Sally; University Hospitals of Leicester NHS Trust, Cardiac/Pulmonary Rehabilitation |
| Keywords:                     | Rehabilitation medicine < INTERNAL MEDICINE, Health economics < HEALTH SERVICES ADMINISTRATION & MANAGEMENT, Tuberculosis < INFECTIOUS DISEASES, Adult thoracic medicine < THORACIC MEDICINE                                                                                                                                                                                                                                                                                                                                                                                                                                                                                                                                                                                                                                                                                                                                                                                                                                                                                                                                         |
|                               |                                                                                                                                                                                                                                                                                                                                                                                                                                                                                                                                                                                                                                                                                                                                                                                                                                                                                                                                                                                                                                                                                                                                      |

SCHOLARONE™  
Manuscripts

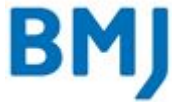

I, the Submitting Author has the right to grant and does grant on behalf of all authors of the Work (as defined in the below author licence), an exclusive licence and/or a non-exclusive licence for contributions from authors who are: i) UK Crown employees; ii) where BMJ has agreed a CC-BY licence shall apply, and/or iii) in accordance with the terms applicable for US Federal Government officers or employees acting as part of their official duties; on a worldwide, perpetual, irrevocable, royalty-free basis to BMJ Publishing Group Ltd ("BMJ") its licensees and where the relevant Journal is co-owned by BMJ to the co-owners of the Journal, to publish the Work in this journal and any other BMJ products and to exploit all rights, as set out in our [licence](#).

The Submitting Author accepts and understands that any supply made under these terms is made by BMJ to the Submitting Author unless you are acting as an employee on behalf of your employer or a postgraduate student of an affiliated institution which is paying any applicable article publishing charge ("APC") for Open Access articles. Where the Submitting Author wishes to make the Work available on an Open Access basis (and intends to pay the relevant APC), the terms of reuse of such Open Access shall be governed by a Creative Commons licence – details of these licences and which [Creative Commons](#) licence will apply to this Work are set out in our licence referred to above.

Other than as permitted in any relevant BMJ Author's Self Archiving Policies, I confirm this Work has not been accepted for publication elsewhere, is not being considered for publication elsewhere and does not duplicate material already published. I confirm all authors consent to publication of this Work and authorise the granting of this licence.

1  
2  
3  
4  
5  
6  
7  
8  
9  
10  
11  
12  
13  
14  
15  
16  
17  
18  
19  
20  
21  
22  
23  
24  
25  
26  
27  
28  
29  
30  
31  
32  
33  
34  
35  
36  
37  
38  
39  
40  
41  
42  
43  
44  
45  
46  
47  
48  
49  
50  
51  
52  
53  
54  
55  
56  
57  
58  
59  
60

1 **Title:** A study protocol for a randomised controlled trial assessing the impact of Pulmonary  
2 Rehabilitation on maximal exercise capacity for adults living with Post-TB lung disease:  
3 Global RECHARGE Uganda

#### 4 **Authors**

5 Winceslaus Katagira<sup>1</sup>, Mark W. Orme<sup>2,3</sup>, Amy V. Jones<sup>2,3</sup>, Richard Kasiita<sup>4</sup>, Rupert Jones<sup>5</sup>,  
6 Andy Barton<sup>5</sup>, Ruhme Miah<sup>2,3</sup>, Adrian Manise<sup>6</sup>, Jesse Matheson<sup>7</sup>, Robert C. Free<sup>3</sup>, Michael  
7 C. Steiner<sup>2,3</sup>, Bruce Kirenga<sup>1</sup> and Sally J. Singh<sup>2,3</sup>

#### 8 **Affiliations**

- 9 1. Makerere University Lung Institute, Kampala, Uganda
- 10 2. Department of Respiratory Sciences, University of Leicester (UK)
- 11 3. Centre for Exercise and Rehabilitation Science (CERS), NIHR Leicester Biomedical  
12 Research Centre – Respiratory, University Hospitals of Leicester NHS Trust - Leicester  
13 (UK)
- 14 4. Department of Physiotherapy, Mulago Hospital, Kampala, Uganda
- 15 5. Faculty of Health, University of Plymouth (UK)
- 16 6. NIHR Leicester Biomedical Research Centre, University Hospitals of Leicester NHS  
17 Trust - Leicester (UK)
- 18 7. Department of Economics, University of Sheffield, Sheffield, United Kingdom

#### 19 **Protocol version:**

20 Version 1.0 July 2019

#### 21 **Funding source:**

22 This research was funded by the National Institute for Health Research (NIHR) (17/63/20)  
23 using UK aid from the UK Government to support global health research. The views expressed  
24 in this publication are those of the author(s) and not necessarily those of the NIHR or the UK  
25 Department of Health and Social Care.

#### 26 **Roles and responsibilities of authors**

- 27 a) Substantially contributed to the conception and/ or design of the work
- 28 b) Substantially contributed to the acquisition, analysis, or interpretation of data for the work
- 29 c) Substantially contributed to the drafting of the work and/ or revising it critically for  
30 important intellectual content

#### 32 **Name and contact information for corresponding author**

33 Katagira Winceslaus, wincegira@gmail.com

34 **Word count:** 3,998

**Abstract****Introduction**

The burden of post-TB lung disease (PTBLD) is steadily increasing in sub-Saharan Africa, causing disability among TB survivors. Without effective medicines, the mainstay of PTBLD treatment evolves around disease prevention and supportive treatment. Pulmonary rehabilitation (PR), a low-cost, non-pharmacological intervention has shown effectiveness in a group of PTBLD individuals but has not been tested in a clinical trial. This study aims to assess the impact of a 6-week PR programme on maximal exercise capacity and other outcomes among adults in Uganda living with PTBLD.

**Methods and analysis**

This is a randomized waiting-list controlled trial with blinded outcome measures, comparing PR versus usual care for patients with PTBLD. A total of 114 participants will be randomized (1:1) to receive either usual care (on the waiting list) or PR, with follow-up assessments at 6- and 12-weeks post-intervention. The primary outcome is change in walking distance measured by the Incremental Shuttle Walk Test from baseline to the end of 6-weeks of PR. All secondary outcomes will be compared between the PR and usual care arms from baseline to 6- and 12-week follow-ups. Secondary outcomes include self-reported respiratory symptoms, physical activity, psychological well-being, health related quality of life and cost benefit analysis. All randomized participants will be included in the intention to treat analysis population. The primary efficacy analysis will be based on both per protocol and modified intention-to-treat populations.

**Ethics and dissemination**

The trial has received ethical clearance from the Mulago Hospital Research and Ethics Committee (MHREC 1478), Kampala, Uganda as well as the Uganda National Council for Science and Technology (SS 5105). Ethical approval has been obtained from the University of Leicester, United Kingdom research ethics committee (Ref No. 22349). Study findings will be published in appropriate peer-reviewed journals and disseminated at appropriate local, regional and international scientific meetings and conferences.

**Strengths and limitations of this study**

The study aims to determine the effectiveness of PR for individuals with PTBLD in a clinical trial setting. To our knowledge, this is the first pragmatic, fully powered effectiveness trial for

1  
2  
3 67 PR in PTBLD in Africa. This is a progression of previous work that established feasibility and  
4 68 acceptability of PR design for people living with PTBLD in Uganda.

5  
6  
7 69 Due to funding limitations, we are unable to carry out a multi-site study. This may limit  
8  
9 70 generalizability of the study findings.

10  
11  
12 71 **Trial registration:** ISRCTN18256843

13  
14 72 **Key words**

15  
16 73 Pulmonary Rehabilitation, Post-TB lung disease, Chronic Respiratory disease, non-drug  
17 74 treatment, Exercise, Education

18  
19 75

20  
21 76

22  
23 77

24  
25 78 **Introduction**

26  
27 79 **Background and rationale**

28  
29 80 In 2018, 24% of the global Tuberculosis (TB) incident cases occurred in the African region [1].  
30  
31 81 Furthermore, 24 of the 30 high TB/Human Immunodeficiency Virus (HIV) burden countries,  
32  
33 82 including Uganda, are in the African region; accounting for 71% of the global burden of HIV  
34  
35 83 associated TB [1]. Despite great strides made over the recent years to achieve the 90%  
36  
37 84 treatment success rate, as part of the “End TB strategy” target [1], a significant number of TB  
38  
39 85 survivors continue to have poor health related quality of life [2]. This may be attributed to the  
40  
41 86 pulmonary function impairment following TB treatment which has been reported in  
42  
43 87 approximately 50% of pulmonary TB survivors [3]. The reduction in ventilation and perfusion  
44  
45 88 attributed to the permanent lung parenchymal damage [4] clinically manifests as long-term  
46  
47 89 respiratory symptoms and eventually chronic respiratory disease (CRD), including chronic  
48  
49 90 obstructive pulmonary disease (COPD), bronchiectasis and aspergillosis [5, 6].

50  
51 91 Adults with post-TB respiratory symptoms develop skeletal muscle dysfunction, related to  
52  
53 92 physical inactivity and systemic inflammation, which is often compounded by impaired  
54  
55 93 nutrition and poverty [7]. Such patients enter a vicious cycle with falling body weight,  
56  
57 94 progressive morbidity and increased mortality [7]. Individuals affected by CRDs tend to avoid  
58  
59 95 exercise and become increasingly deconditioned and demotivated, leading to a cycle of decline.  
60  
96 96 There are no effective medicines for post-TB lung disease (PTBLD) and the mainstay of

1  
2  
3 97 treatment evolves around disease prevention and supportive treatment. The disease, previously  
4 98 neglected by health services and researchers, is now the focus of increasing interest [8, 9].

5  
6  
7 99 In low- and middle-income countries (LMIC) where health care focuses on treatment and  
8  
9 100 prevention of infectious diseases, as opposed to managing chronic diseases, the care for adults  
10  
11 101 living with CRD presents a major challenge. Consequently, patients that require long-term and  
12  
13 102 systemic approaches often receive sub-optimal medical care, inevitably leading to preventable  
14  
15 103 deaths in resource poor settings.

16  
17 104 Pulmonary Rehabilitation (PR) is a low cost, high impact intervention that reverses the  
18  
19 105 disability associated with CRDs, and is supported by the highest level of research evidence in  
20  
21 106 high income countries [10, 11]. A PR program brings together health professionals from many  
22  
23 107 disciplines offering supervised exercise training and disease education, supporting people to  
24  
25 108 manage their own disease. However, in LMIC where the burden of CRDs is increasing fastest,  
26  
27 109 PR is scarce and health care services are poorly adapted to deal with such diseases. Although  
28  
29 110 PR is a grade “A” evidence treatment for adults with COPD [12] and has been utilized in other  
30  
31 111 chronic lung diseases [13], it’s efficacy in Post TB lung disease is not known. In a development  
32  
33 112 study to examine the impact of PR for people with PTBLD in Uganda, it was feasible to run a  
34  
35 113 PR programme and participants reported clinically important improvements in quality of life,  
36  
37 114 exercise capacity, and respiratory outcomes [14]. To date, there has been little attention to the  
38  
39 115 role of PR in PTBLD globally, particularly in Africa where a significant number of PTB  
40  
41 116 survivors reside.

### 40 117 **Study Objectives**

41  
42 118 The primary objective of this trial is to assess the impact of a 6-week PR programme on  
43  
44 119 maximal exercise capacity using the incremental shuttle walking test (ISWT) among adults  
45  
46 120 living with PTBLD post-intervention.

47  
48 121 The secondary objectives include assessing the impact of PR on quality of life and other  
49  
50 122 outcomes for patients with Post-TB lung disease, and to conduct a cost-benefit analysis of PR.

### 51 123 **Methods**

#### 52 124 **Study design**

53  
54  
55 125 This is a prospective, randomised waiting-list controlled trial with blinded outcome measures,  
56  
57 126 comparing PR versus usual care for patients with post-TB lung disease. During this  
58  
59  
60

1  
2  
3 127 effectiveness trial, a total of 114 participants will be randomized (1:1) to receive either usual  
4 128 care (waiting-list) or PR (Figure 1).

### 7 129 **Study setting**

9 130 The study is conducted at the PR centre located at the Makerere University Lung Institute  
10 131 (MLI) Clinic, Kampala, Uganda. The MLI clinic is an academic outpatient clinic within the  
11 132 Mulago National Referral hospital, a teaching and clinical research hospital for Makerere  
12 133 University.

### 16 134 **Study population**

#### 19 135 **Recruitment**

21 136 Adults with PTBLD will be referred from health facilities and clinics (TB treatment centres  
22 137 and HIV/TB caring centres) around Kampala to the PR centre. Existing registers have around  
23 138 300 adults living with PTBLD and additional patients will be screened directly from the  
24 139 outpatient departments.

#### 28 140 **Participant invitation**

30 141 The process of identifying and inviting eligible patients was refined in the development study.  
31 142 Eligible individuals identified as having an established PTBLD diagnosis will be received at  
32 143 the PR centre at the MLI. Literate participants will be asked to read the patient information  
33 144 sheet (PIS) about the study, written in English or translated in the local language. Illiterate  
34 145 participants will have the contents read to them in full by a study staff, in the presence of a  
35 146 witness who will be present during the whole process. Participants will have the opportunity to  
36 147 discuss the PIS with the study medical personnel. Once the study staff are satisfied that the  
37 148 participant has understood the PIS, and is interested in taking part in the study, they will be  
38 149 taken through the informed consent process. Participants will give consent before undergoing  
39 150 screening tests and procedures, and if still eligible after the screening process, will be taken  
40 151 through another informed consent process for randomisation.

49 152

#### 52 153 **Eligibility criteria**

##### 54 154 ***Inclusion criteria***

56 155 A patient with PTBLD is eligible for the trial if they meet all of the following criteria: aged  
57 156  $\geq 18$  years, willing and able to provide written informed consent (signed or witnessed consent  
58 157 if the patient is illiterate), a documented past history of smear positive pulmonary TB with



1  
2  
3 158 treatment completed  $\geq 6$  months prior to study enrolment, a negative Xpert MTB/RIF assay for  
4  
5 159 *Mycobacterium tuberculosis* at the time of study enrolment, and report a Medical Research  
6  
7 160 Council (MRC) dyspnoea grade  $\geq 2$ .

### 8 9 161 **Exclusion criteria**

10 162 A PTBLD patient is ineligible for the study if they have co-morbidities that preclude exercise  
11  
12 163 (e.g. known unstable cardiovascular disease, locomotor difficulties) or if they are unwilling to  
13  
14 164 participate for any reason or had any condition (social or medical) which in the opinion of the  
15  
16 165 investigator would make study participation unsafe.

### 17 18 166 **Randomization**

19  
20 167 Once eligible participants have consented to take part in the study, they will be randomised  
21  
22 168 using a web-based randomisation system (<https://www.sealedenvelope.com/>). Participants will  
23  
24 169 be randomized (1:1) to receive either usual care or PR. Access to the web-based system will be  
25  
26 170 controlled through an authorised username and password. Randomisations will be conducted  
27  
28 171 by a member of the study team independent from the data collection team and will be revealed  
29  
30 172 to the data collection and intervention delivery teams after baseline measurements have been  
31  
32 173 obtained.

### 33 174 **Participant timeline**

34 175 After randomisation, the PR team will explain to participants when the PR sessions will take  
35  
36 176 place. For each individual participant, the hospital based PR programme will last six weeks  
37  
38 177 followed by a follow-up period of six weeks of home exercises. Participants in the control arm  
39  
40 178 (waiting-list) of the trial will be informed of the date for their first exercise session in  
41  
42 179 approximately 12-15 weeks. Based on our development study [15], we expect to find prolonged  
43  
44 180 and possibly improved effects of PR at follow-up. Our experience indicates that a follow-up  
45  
46 181 period of more than three months after the start of the PR programme would be unrealistic in  
47  
48 182 this environment without unacceptable attrition. Study participants will receive compensation  
49  
50 183 for their time and transport.

### 51 184 **Pulmonary Rehabilitation Team**

52 185 The PR team has received adequate training on the delivery of PR and participated in the  
53  
54 186 development study which informed this trial [14]. Furthermore, the individuals are registered  
55  
56 187 health professionals (physiotherapist, physicians, and nurses) and have undertaken training  
57  
58 188 regarding the study tests, procedures and measurements per protocol as well as Good Clinical  
59  
60 189 Practice.

## 190 **Assessment and follow up**

191 Participants in both arms of the trial will be asked to attend the baseline, 6-week and 12-week  
192 post-intervention assessment visits at the PR centre at MLI. Data will be collected by the study  
193 staff (medical doctor, nurse and physiotherapist). Table 1 shows all baseline and follow up  
194 assessment data that will be collected during the trial, in accordance with a minimum  
195 recommended dataset for PR trials in LMIC[16].

## 196 **Study procedures**

197 During the screening visit, prospective participants will undergo clinical examination, MRC  
198 dyspnoea grading, sputum examination using Xpert MTB/RIF assay and a frontal chest  
199 radiograph. In addition, demographic, socio-economic, medical and clinical history (including  
200 respiratory symptoms and exposure history to cigarettes and biomass) will be collected using  
201 a standardised questionnaire.

202 At the randomisation visit, spirometry will be performed using American Thoracic Society and  
203 European Respiratory Society guidelines [17].

## 204 **Sample size**

205 The study will be powered to detect a 35m difference in the ISWT measured at baseline and  
206 after completion of PR[18]. Assuming that ISWT follows an approximately normal  
207 distribution, a power calculation based on a paired t-test was performed. Assuming a statistical  
208 significance level of 5% and a statistical power of 80%, in order to detect a 35m difference in  
209 ISWT measured at baseline and after completion of PR, a total of 114 participants are required  
210 (PR: 57 participants or waiting list: 57 participants). Our recent feasibility study [15] was used  
211 to obtain an estimate of the pooled standard deviation for the power calculation. Conservatively  
212 assuming up to 30% loss to follow-up at 6-weeks, this will require up to 114 participants to be  
213 recruited and randomised (1:1) to each arm. Using the 70% ineligibility rate during screening  
214 from the feasibility study, we will need to screen approximately 543 PTBLD patients.

## 215 **Blinding (masking)**

216 Due to the nature of PR, it will not be possible to blind participants to their group allocation  
217 but participants will be asked not to reveal their group during the follow-up assessments. The  
218 participant and treating clinician will be aware of treatment allocation, however, the outcome  
219 measures will be performed by staff blinded to treatment allocation and the ISWT (primary

220 outcome) will be prioritised to reduce the risk of un-blinding. Any episodes of un-blinding will  
221 be documented and reported.

## 222 **Treatment arms**

### 223 *Usual care (control arm)*

224 The participants in the waiting-list (control) arm will receive usual care and will be offered PR  
225 after completing 12-weeks of follow-up. There are currently no guidelines for the clinical  
226 management of PTBLD both locally and internationally. Usual care will be optimised where  
227 possible and will include the following: frontal chest radiograph, spirometry to screen for  
228 airway diseases, inhalational therapies for airway disease amenable to treatment (where  
229 appropriate), antibiotic and systemic glucocorticoid therapy for infective exacerbations (where  
230 appropriate), and verbal advice to reduce exposures to risk factors such as tobacco smoking  
231 and biomass smoke.

### 232 *Pulmonary Rehabilitation (trial intervention arm)*

233 In addition to usual care described above, participants in the intervention arm will receive PR.  
234 PR will consist of a six-week programme offered to a group of up to 12 participants, with  
235 sessions occurring twice weekly for at least two hours (approximately one hour for education  
236 and one hour for exercise).

### 237 *Warm-up and cool-down*

238 Before starting exercises, participants will be taken through a group warm up session, followed  
239 by a cool down session at the end of exercises, each lasting 10-15 minutes. Warm up is aimed  
240 at readying the body for both the physical aspects of performance (increased blood flow and  
241 muscle temperature) and mental readiness for exercise whilst cool down session facilitates a  
242 smoother decline in temperature and blood flow [19] Both warm up and cool down will consist  
243 of stretching and flexibility exercises during which participants will perform both upper and  
244 lower body flexibility exercises, held for 10 to 15 seconds each (including stretching of major  
245 muscle groups such as the calves, hamstrings, quadriceps, and biceps, as well as range of  
246 motion exercises for the neck, shoulders, and trunk), 2 days/week[13]. The cool down session  
247 has the same activities of warm-up (supplementary table 2) but performed at a slower pace.

### 248 *Endurance training*

249 Each participant will go through two stations of endurance exercise; load-adjustable stationary  
250 cycling and ground-based walking stations. We shall employ an intensity of continuous  
251 exercise at each station for 10 minutes or until a Borg dyspnoea score of 4-6 (moderate to [very]

severe) is attained [20, 21]. Participants who may have difficulty in sustaining continuous high-intensity exercise will have interspersed periods of rest or lower intensity exercise to maximise the benefits of exercise training [13]. The walking exercise regime will be individually prescribed to participants based around their performance in the ISWT. Participants will be encouraged to walk at 85% of their maximal ISWT walking speed [22].

### **Strength training**

Each participant will go through two stations for strengthening upper limb muscles (pull-ups and biceps curls) and two for strengthening lower limb muscles (sit-to-stand and step-up exercises). Each of the stations will include 3 sets of 8-12 repetitions. Participants will be asked to continue doing both endurance and resistance exercises at home, unsupervised.

### **Education sessions**

A dedicated education session will be conducted at the start of each class, before the exercise regimes (Table 2; 12 sessions in total).

**Table 2: Education content of the Global RECHARGE Pulmonary Rehabilitation program**

1. Normal anatomy and physiology of the lungs
2. Pathophysiology of chronic lung disease
3. Tuberculosis and how it causes lung damage
4. Coping with chronic lung disease and coping with stress
5. Avoidance of risk factors for chronic lung disease
6. Early recognition and treatment of exacerbations
7. Strategies for managing breathlessness
8. Energy conservation during activities of daily living
9. Role and rationale for medications and devices
10. Benefit of exercise and physical activities
11. Healthy food intake
12. Secretion clearance techniques

### **Study Outcomes**

#### **Primary outcome**

The primary outcome is change in walking distance measured by the ISWT from pre to post-intervention. A group change of at least 35m is considered clinically important [18].

### 270 **Incremental Shuttle Walking Test**

271 The ISWT requires the patient to walk up and down a 10-meter course, identified by two cones  
272 inset 0.5m from either end to avoid the need for abrupt changes in direction. The speed at which  
273 the patient walks is dictated by an audio signal played on an audio device. Each participant will  
274 receive standardised instructions to: "Walk at a steady pace, aiming to turn around when you  
275 hear the signal. You should continue to walk until you feel that you are unable to maintain the  
276 required speed without becoming unduly breathless" [23]. To ensure the learning effect is  
277 accounted for, a practice ISWT will be performed and the participant will receive  
278 encouragement from the physiotherapist throughout the test in an effort to increase the distance  
279 one can walk. The test is terminated when either 1) the patient indicates that they are unable to  
280 continue, 2) if the operator determines that the patient is not fit to continue, or 3) the operator  
281 assesses that the patient was unable to sustain the speed and cover the distance to the cone prior  
282 to the beep sounding [23].

### 283 **Secondary outcomes**

284 All secondary outcomes will be compared between the PR and usual care arms from baseline  
285 to 6-week and 12-week follow-ups.

286 Health questionnaires will be administered including COPD assessment test (CAT), Clinical  
287 COPD questionnaire (CCQ), Hospital Anxiety and Depression Scale (HADS), Patient Health  
288 Questionnaire (PHQ-9), Work Productivity and Activity Impairment (WPAI), and European  
289 Quality of Life 5-Dimensions (EQ-5D-5L). Pulmonary rehabilitation specific measurements  
290 will include the ISWT, Endurance Shuttle Walking Test (ESWT), mid upper arm  
291 circumference (MUAC) and sit-to-stand test.

### 292 **Respiratory symptoms**

293 The CCQ is a simple 10-item validated health related quality of life (HRQoL) questionnaire  
294 with good psychometric properties [24]. It consists of 10 items, each scored between 0-6,  
295 divided into three domains (symptoms, functional, mental), with higher scores representing  
296 worse HRQoL. The CCQ is responsive to PR with an estimated minimal important  
297 improvement of 0.4 [25].

298 The CAT is a validated, self-administered, short and simple questionnaire that measures  
299 HRQoL [26]. The CAT consists of eight items, each scored between 0-5 scored with a range  
300 of 0-40; scores of 0-10, 11-20, 21-30, 31-40 representing mild, moderate, severe or very severe

1  
2  
3 301 negative impact on HRQoL, respectively. The CAT is responsive to the effects of PR with an  
4  
5 302 estimated minimal clinically important difference (MCID) of 2 points [27].  
6  
7

### 8 303 **Psychological wellbeing**

9 304 The HADS questionnaire is a validated, easy to use screening tool for anxiety and depression  
10  
11 305 symptoms in a hospital outpatient setting [28]. The self-report rating scale is composed of 14  
12  
13 306 items with two 7-item subscales (HADS-Anxiety and HADS-Depression), both ranging from  
14  
15 307 0-21 with higher scores indicating more severe distress. The HADS is responsive to PR with  
16  
17 308 estimated MCID of 2 points on each subscale [29, 30].

18 309 The PHQ-9 is a nine item, validated, short, self-administered, and positively worded  
19  
20 310 questionnaire designed to measure the severity of depression over the last 2 weeks [31]. The  
21  
22 311 total score ranges from 0-27, with high scores indicating high depression, specifically; no  
23  
24 312 depression (0-4), mild (5-9), moderate (10-14), moderately severe (15-19), or severe  
25  
26 313 depression (20-27) [31]. The PHQ-9 has an estimated MCID of 5 points [32].  
27

### 28 314 **Work productivity and impairment**

29 315 The WPAI questionnaire is a validated instrument to measure impairments in work and  
30  
31 316 activities, both paid and unpaid. The WPAI self-administered questionnaire measures time  
32  
33 317 missed from work, impairment of work and regular activities due to overall health and  
34  
35 318 symptoms, during the past seven days [33]. We have added two follow-up supplementary  
36  
37 319 questions, following the WPAI format, to measure productivity with respect to regular  
38  
39 320 household duties in low resource settings.

### 40 321 **Health Related Quality of Life**

41 322 The EQ-5D-5L questionnaire is a standardised questionnaire, developed to measure of health  
42  
43 323 outcomes and defines health in terms of five dimensions: mobility, self-care, usual activities,  
44  
45 324 pain or discomfort and anxiety or depression [34]. The questionnaire also contains a visual  
46  
47 325 analogue scale. The EQ-5D-5L will be used to calculate patient costs per quality adjusted life  
48  
49 326 year (QALY). EQ-5D-5L is responsive to change following PR, with a MCID of 0.05 (utility  
50  
51 327 index) and 7.0 (visual analogue scale) [35].  
52

### 53 328 **Exercise capacity/ physical function**

54 329 The five-repetition sit-to-stand test (FTSTS) is a commonly used functional performance  
55  
56 330 measure of lower-limb strength [36]. The FTSTS measures the time taken to stand five times  
57  
58 331 from a sitting position as rapidly as possible. The FTSTS is reliable, valid and responsive to  
59  
60 332 PR with an estimated MCID of 1.7 seconds [37].



333 The MRC dyspnoea scale is a 5-point self-administered questionnaire based on the sensation  
 334 of breathing difficulty experienced by the patient during daily life activities. The questionnaire  
 335 is short, easy to use and has grades ranging from 1 (none) to 5 (almost complete incapacity),  
 336 with high grades indicating high perceived respiratory disability[38]. The MRC dyspnoea scale  
 337 is responsive to PR with estimated MCID of 1 points [39, 40].

338 The ESWT is a constant-load exercise test which measures the ability of the participant to  
 339 sustain a given sub-maximal exercise capacity; the participant aims to walk at 85% of their  
 340 maximal ISWT walking speed [22]. The ESWT is frequently used as an exercise tolerance  
 341 outcome measure for PR. The endpoint of the test is the time the participant walks at the  
 342 constant endurance speed. The test consists of pre-recorded audio signals at different  
 343 frequencies giving a total of 16 walking speeds. The ESWT is responsive to PR with MCID  
 344 following a 6-week PR programme between 174-279 seconds [41].

### 345 **Physical activity (PA)**

346 Participants will be asked to wear an ActiGraph wGT3X-BT activity monitor (ActiGraph,  
 347 Pensacola, FL, USA), able to detect a range of PA intensities [42]. Participants will be  
 348 instructed to wear the PA monitor on the right anterior hip during waking hours for one week  
 349 prior to attending PR (pre-intervention) and for one week prior to their post-intervention  
 350 assessment (supplementary Table 1). Written instructions to follow will be provided to the  
 351 participants prior to wearing and using the PA monitors.

### 352 **Cost/benefit analysis**

353 The cost of starting and running a PR program will include single and recurrent costs (Table  
 354 3). Single payments will include the necessary costs needed to set up and run PR. Recurrent  
 355 costs refer to any item with a life expectancy of  $\leq 1$  year (e.g. disposable materials) [43]. The  
 356 fixed costs will be captured prior to enrolling the first participant into the PR programme and  
 357 the recurrent costs will be collected at the mid-stage of recruitment. The average fixed and  
 358 recurrent costs will be calculated separately.

359 **Table 3: Table showing the variables used to calculate fixed and recurrent costs (not an**  
 360 **exhaustive list)**

| Fixed costs                                                                                         | Recurrent costs                                                                                        |
|-----------------------------------------------------------------------------------------------------|--------------------------------------------------------------------------------------------------------|
| <ul style="list-style-type: none"> <li>Electrical equipment (laptop, printer, projector)</li> </ul> | <ul style="list-style-type: none"> <li>Staff time to conduct PR (assessment at baseline and</li> </ul> |

|                                                                                                                                                                                                                                                                                                                                                                                                                                                                                                                                                                                                                                                                                                                                                                                                                            |                                                                                                                                                                                                                                                                                                                                                                                                                                            |
|----------------------------------------------------------------------------------------------------------------------------------------------------------------------------------------------------------------------------------------------------------------------------------------------------------------------------------------------------------------------------------------------------------------------------------------------------------------------------------------------------------------------------------------------------------------------------------------------------------------------------------------------------------------------------------------------------------------------------------------------------------------------------------------------------------------------------|--------------------------------------------------------------------------------------------------------------------------------------------------------------------------------------------------------------------------------------------------------------------------------------------------------------------------------------------------------------------------------------------------------------------------------------------|
| <ul style="list-style-type: none"> <li>• Equipment for PR (weights, treadmill, cycle ergometer, country-specific equipment, step-up box, chairs)</li> <li>• Equipment for shuttle walking tests (cones, licences, stop watches, tape measure, electrical equipment to play audio)</li> <li>• Equipment for PR assessment (height stadiometer, weight scales, sphygmomanometer, pulse oximeter, spirometer, calibration syringe, country-specific equipment)</li> <li>• Additional safety equipment (blood glucose monitor, Oxygen cylinder holder)</li> <li>• Miscellaneous (filing cabinets, storage units, questionnaire translations, questionnaire licences, staff uniform)</li> <li>• Staff time (creating core PR content including educational material, exercise diaries and other necessary paperwork)</li> </ul> | <p>discharge, conduct PR classes, telephone calls and data entry)</p> <ul style="list-style-type: none"> <li>• Disposable equipment (for blood glucose monitor, spirometer mouthpieces, nose-clips)</li> <li>• Servicing costs (spirometer, PR equipment, specifically cycle ergometers)</li> <li>• Miscellaneous (Oxygen cylinders, questionnaire licences, stationery (paper))</li> <li>• Patient costs (transport and meals)</li> </ul> |
|----------------------------------------------------------------------------------------------------------------------------------------------------------------------------------------------------------------------------------------------------------------------------------------------------------------------------------------------------------------------------------------------------------------------------------------------------------------------------------------------------------------------------------------------------------------------------------------------------------------------------------------------------------------------------------------------------------------------------------------------------------------------------------------------------------------------------|--------------------------------------------------------------------------------------------------------------------------------------------------------------------------------------------------------------------------------------------------------------------------------------------------------------------------------------------------------------------------------------------------------------------------------------------|

361 **Legend:** PR Pulmonary Rehabilitation

### 362 Patient and public involvement (PPI)

363 Adults with CRDs tell us how they are greatly troubled by breathlessness and express interest  
 364 in attending a program that can help better manage their condition. They express interest in  
 365 attending a hospital based programme that allows them to interact with fellow patients. They  
 366 have additionally the programme and how it is delivered. We have also set up a PPI group at  
 367 MLI that will meet regularly, and assist with disseminating results following the study.

### 368 Data analysis

369 All randomized participants will be included in the intention to treat analysis population. The  
 370 primary efficacy analysis will be based on both per protocol and modified intention-to-treat  
 371 populations. For the primary analysis, the differences in the primary outcome (walking distance  
 372 on the ISWT) with the corresponding two-sided 95% confidence interval and p-value will be  
 373 estimated using a stratified analysis; a p-value <0.05 will be the measure for statistical  
 374 significance. Predictive analytics software (SPSS; Statistical Package for the Social Sciences)



1  
2  
3 375 will be used to analyse the data. Continuous data will be presented as mean and standard  
4 376 deviation or median and interquartile ranges, whilst categorical data will be presented as  
5 377 frequencies and percentages. All data will be assessed for normality and appropriate parametric  
6 378 and non-parametric tests will be used. Categorical variables between the two treatment groups  
7 379 will be compared using chi-square and Fisher exact test as appropriate. Continuous variables  
8 380 will be compared using t-test for normally distributed data and Mann-Whitney-U test for non-  
9 381 normally distributed data. Any baseline differences will be adjusted for. Both intention-to-treat  
10 382 and per-protocol analyses will be conducted after imputing any missing data. There will be no  
11 383 formal interim analysis of data. The final analysis will be performed when all the 114  
12 384 participants have completed the last study related visit or previously withdrawn from the trial.

### 21 385 **Data management**

22  
23 386 An Independent Data Monitoring Committee will be established at the University of Leicester,  
24 387 UK to review high level safety data (serious adverse events and adverse events) at least  
25 388 quarterly, and as needed on an ad hoc basis to ensure the continuing safety of the participants  
26 389 enrolled in this study.

27  
28  
29  
30  
31 390 All data collected during the trial will be entered into the Research Electronic Data Capture  
32 391 (REDCap) [44, 45] with access via a secure password protected web-interface hosted by the  
33 392 University of Leicester, UK. Study participants will be assigned a study-specific identification  
34 393 code.

### 38 394 **Ethics and dissemination**

39  
40  
41 395 The study received ethical approvals from the University of Leicester research ethics  
42 396 committee (United Kingdom) (Ref No. 22349) and locally from the Mulago Hospital Research  
43 397 and Ethics Committee (MHREC1478), Kampala, Uganda as well as the Uganda National  
44 398 Council for Science and Technology (SS5105).

### 48 399 **Confidentiality**

49  
50  
51 400 The confidentiality of all participants will be protected to the fullest extent possible. All patient  
52 401 information will be kept secure and will be available only to the treatment staff and  
53 402 representatives of the sponsors, regulators, and ethics committees.

54  
55  
56  
57 403 All participants will be provided with a unique identification number which will be recorded  
58 404 in the participant enrolment log and stored in a secure place. Study participants will not be

1  
2  
3 405 identified by name on any case report form, email or on any other documentation sent to the  
4  
5 406 central database and will not be reported by name in any report, presentation or publication  
6  
7 407 resulting from data collected in this study. Participants' data/specimens will be identified by  
8  
9 408 study number or hospital number only.

### 10 409 **Dissemination**

11  
12 410 Results of the study will be published in peer-reviewed journals and findings disseminated at  
13  
14 411 appropriate local, regional and international scientific meetings and conferences. Social media  
15  
16 412 will be used to disseminate information and summaries of results to a wider public domain.  
17  
18 413 Furthermore, a participant dissemination meeting will be held following this trial, in which  
19  
20 414 study participants will receive a summary of the findings.

### 21 415 **COVID-19 provisions**

22  
23 416 Modifications will be made to the delivery of the PR program due to the Corona Virus Disease  
24  
25 417 2019 (COVID-19) pandemic. The PR room will be re-organized to allow for social distancing  
26  
27 418 (minimum 2-meters) for both study staff and study participants. The maximum number of  
28  
29 419 participants participating in the PR session will be reduced from 12 to 8 to ensure social  
30  
31 420 distancing between participants. Before accessing the PR room, all participants and staff will  
32  
33 421 be required to undergo temperature measurement using a hand-held non-contact thermometer,  
34  
35 422 wash hands with soap or alcohol-based hand sanitizer. All participants will be provided with  
36  
37 423 face masks during PR sessions. All surfaces inside the PR room will be disinfected before and  
38  
39 424 after every PR session. PR sessions will be conducted in the morning hours to allow  
40  
41 425 participants travel back home in time before the evening rush hour and the standard operating  
42  
43 426 procedure for data collection will be modified ensure 2-meter distancing between the study  
44  
45 427 staff and study participant. Study participants will undergo COVID-19 testing before starting  
46  
47 428 PR and as needed during the hospital based sessions. All study staff will be required to wear  
48  
49 429 N95 masks at all times and will undergo COVID-19 training with emphasis on infection  
50  
51 430 prevention and control, and screening study participants for signs and symptoms of the disease.

52 431

### 53 432 **Figure legend**

54 433 Figure 1: Figure showing the study flow in the Post TB Pulmonary Rehabilitation trial

55  
56 434 **Legend:** *PTBLD-post-TB lung disease; PR – Pulmonary Rehabilitation; R&A – Recruitment*  
57  
58 435 *and Assessment*

59  
60 436

1  
2  
3 437 **Contributors**

4  
5 438 All authors have substantially contributed to the conception and design of the study. WK  
6  
7 439 drafted the manuscript. All authors of the paper have revised the content and approved the final  
8  
9 440 version to be published. All authors are accountable for all aspects of the work.

10  
11 441 **Competing interests**

12 442 None declared

13  
14  
15 443 **Funding**

16 444 This research was funded by the National Institute for Health Research (NIHR) (17/63/20)  
17  
18 445 using UK aid from the UK Government to support global health research. The views expressed  
19  
20 446 in this publication are those of the author(s) and not necessarily those of the NIHR or the UK  
21  
22 447 Department of Health and Social Care.

23  
24 448 **Data sharing**

25 449 Following the completion of the project, data from the Global Health Research Group on  
26  
27 450 Respiratory Rehabilitation (Global RECHARGE) Core Dataset [16] will be made available to  
28  
29 451 the wider community upon reasonable request.

30  
31 452

32  
33  
34 453  
35  
36  
37  
38  
39  
40  
41  
42  
43  
44  
45  
46  
47  
48  
49  
50  
51  
52  
53  
54  
55  
56  
57  
58  
59  
60

454 **References**

- 455 1. WHO, *Global tuberculosis report 2019*. 2019.
- 456 2. Dye C, H.A., Maher D, S. Hosseini SM, Nkhoma W, and Salaniponi FM., *Disease and Mortality in Sub-Saharan Africa. 2nd edition. Chapter 13. Tuberculosis*. 2006.
- 457 3. Pasipanodya, J.G., et al., *Pulmonary impairment after tuberculosis*. *Chest*, 2007. **131**(6): p. 1817-1824.
- 459 4. Harries, A.D., et al., *Successfully treated but not fit for purpose: paying attention to chronic lung impairment after TB treatment*. *The International Journal of Tuberculosis and Lung Disease*, 2016. **20**(8): p. 1010-1014.
- 462 5. van Kampen, S.C., et al., *International research and guidelines on post-tuberculosis chronic lung disorders: a systematic scoping review*. *BMJ Global Health*, 2018. **3**(4): p. e000745.
- 463 6. Chakaya, J., B. Kirenga, and H. Getahun, *Long term complications after completion of pulmonary tuberculosis treatment: A quest for a public health approach*. *Journal of Clinical Tuberculosis and Other Mycobacterial Diseases*, 2016. **3**: p. 10-12.
- 465 7. Nici, L., et al., *American thoracic society/European respiratory society statement on pulmonary rehabilitation*. *American journal of respiratory and critical care medicine*, 2006. **173**(12): p. 1390-1413.
- 467 8. Allwood, B., et al., *Post-tuberculosis lung health: perspectives from the First International Symposium*. 2020. **24**(8): p. 820-828.
- 469 9. Visca, D., et al., *Post-tuberculosis sequelae: the need to look beyond treatment outcome*. 2020. **24**(8): p. 761-762.
- 471 10. Lacasse, Y., et al., *Meta-analysis of respiratory rehabilitation in chronic obstructive pulmonary disease. A Cochrane systematic review*. 2007.
- 472 11. McCarthy, B., et al., *Pulmonary rehabilitation for chronic obstructive pulmonary disease*. *Cochrane database of systematic reviews*, 2015(2).
- 473 12. Bolton, C.E., et al., *British Thoracic Society guideline on pulmonary rehabilitation in adults: accredited by NICE*. *Thorax*, 2013. **68**(Suppl 2): p. ii1-ii30.
- 474 13. Spruit, M.A., et al., *An official American Thoracic Society/European Respiratory Society statement: key concepts and advances in pulmonary rehabilitation*. *American journal of respiratory and critical care medicine*, 2013. **188**(8): p. e13-e64.
- 475 14. Jones, R., et al., *A pre-post intervention study of pulmonary rehabilitation for adults with post-tuberculosis lung disease in Uganda*. *International Journal of Chronic Obstructive Pulmonary Disease*, 2017. **12**: p. 3533.
- 476 15. Jones, R., et al., *A development study of pulmonary rehabilitation for patients with chronic lung disease in Uganda*. 2016, Eur Respiratory Soc.
- 477 16. Orme, M.W., M. Orme, and R.J.J.o.G.H. Free, *Global RECHARGE: Establishing a standard international data set for pulmonary rehabilitation in low-and middle-income countries*. 2020. **10**(2).
- 478 17. Graham, B.L., et al., *Standardization of spirometry 2019 update. An official American thoracic society and European respiratory society technical statement*. 2019. **200**(8): p. e70-e88.
- 479 18. Evans, R.A. and S.J.J.T. Singh, *Minimum important difference of the incremental shuttle walk test distance in patients with COPD*. 2019. **74**(10): p. 994-995.
- 480 19. Powers, S.K., S.L. Dodd, and E.M. Jackson, *Total fitness & wellness*. 2013: Pearson Higher Ed.
- 481 20. Borg, G., *Perceived exertion as an indicator of somatic stress*. *Scandinavian journal of rehabilitation medicine*, 1970.
- 482 21. Borg, G.A., *Psychophysical bases of perceived exertion*. *Medicine & science in sports & exercise*, 1982.
- 483 22. Revill, S., et al., *The endurance shuttle walk: a new field test for the assessment of endurance capacity in chronic obstructive pulmonary disease*. *Thorax*, 1999. **54**(3): p. 213-222.

- 1  
2  
3 503 23. Singh, S.J., et al., *Development of a shuttle walking test of disability in patients with chronic*  
4 504 *airways obstruction*. Thorax, 1992. **47**(12): p. 1019-1024.
- 5 505 24. Van der Molen, T., et al., *Development, validity and responsiveness of the Clinical COPD*  
6 506 *Questionnaire*. Health and quality of life outcomes, 2003. **1**(1): p. 13.
- 7 507 25. Kon, S.S., et al., *The Clinical COPD Questionnaire: response to pulmonary rehabilitation and*  
8 508 *minimal clinically important difference*. Thorax, 2014. **69**(9): p. 793-798.
- 9 509 26. Jones, P., et al., *Development and first validation of the COPD Assessment Test*. European  
10 510 *Respiratory Journal*, 2009. **34**(3): p. 648-654.
- 11 511 27. Kon, S.S., et al., *Minimum clinically important difference for the COPD Assessment Test: a*  
12 512 *prospective analysis*. The Lancet Respiratory Medicine, 2014. **2**(3): p. 195-203.
- 13 513 28. Nowak, C., et al., *Accuracy of the hospital anxiety and depression scale for identifying*  
14 514 *depression in chronic obstructive pulmonary disease patients*. Pulmonary medicine, 2014.  
15 515 **2014**.
- 16 516 29. Smid, D.E., et al., *Responsiveness and MCID estimates for CAT, CCQ, and HADS in patients*  
17 517 *with COPD undergoing pulmonary rehabilitation: a prospective analysis*. Journal of the  
18 518 *American Medical Directors Association*, 2017. **18**(1): p. 53-58.
- 19 519 30. Wynne, S., et al., *The Hospital Anxiety and Depression Scale (HADS) in Bronchiectasis:*  
20 520 *Response to pulmonary rehabilitation (PR) and Minimum Clinically Important Difference*  
21 521 *(MCID)*. 2019, Eur Respiratory Soc.
- 22 522 31. Kroenke, K. and R.L. Spitzer, *The PHQ-9: a new depression diagnostic and severity measure*.  
23 523 *Psychiatric annals*, 2002. **32**(9): p. 509-515.
- 24 524 32. Löwe, B., et al., *Monitoring depression treatment outcomes with the patient health*  
25 525 *questionnaire-9*. Medical care, 2004: p. 1194-1201.
- 26 526 33. Reilly, M.C., A.S. Zbrozek, and E.M. Dukes, *The validity and reproducibility of a work*  
27 527 *productivity and activity impairment instrument*. Pharmacoeconomics, 1993. **4**(5): p. 353-  
28 528 365.
- 29 529 34. Group, T.E., *EuroQol-a new facility for the measurement of health-related quality of life*.  
30 530 *Health policy*, 1990. **16**(3): p. 199-208.
- 31 531 35. Nolan, C.M., et al., *The EQ-5D-5L health status questionnaire in COPD: validity,*  
32 532 *responsiveness and minimum important difference*. Thorax, 2016. **71**(6): p. 493-500.
- 33 533 36. Bohannon, R.W., *Sit-to-stand test for measuring performance of lower extremity muscles*.  
34 534 *Perceptual and motor skills*, 1995. **80**(1): p. 163-166.
- 35 535 37. Jones, S.E., et al., *The five-repetition sit-to-stand test as a functional outcome measure in*  
36 536 *COPD*. Thorax, 2013. **68**(11): p. 1015-1020.
- 37 537 38. Stenton, C., *The MRC breathlessness scale*. Occupational Medicine, 2008. **58**(3): p. 226-227.
- 38 538 39. De Torres, J.P., et al., *Power of outcome measurements to detect clinically significant*  
39 539 *changes in pulmonary rehabilitation of patients with COPD*. Chest, 2002. **121**(4): p. 1092-  
40 540 1098.
- 41 541 40. Crisafulli, E. and E.M. Clini, *Measures of dyspnea in pulmonary rehabilitation*.  
42 542 *Multidisciplinary respiratory medicine*, 2010. **5**(3): p. 202.
- 43 543 41. Zatloukal, J., et al., *The minimal important difference for the endurance shuttle walk test in*  
44 544 *individuals with chronic obstructive pulmonary disease following a course of pulmonary*  
45 545 *rehabilitation*. Chronic Respiratory Disease, 2019. **16**: p. 1479973119853828.
- 46 546 42. Bassett, D.R. and D. John, *Use of pedometers and accelerometers in clinical populations:*  
47 547 *validity and reliability issues*. Physical therapy reviews, 2010. **15**(3): p. 135-142.
- 48 548 43. Lucas, A.O. and H.M. Gilles, *Short textbook of public health medicine for the tropics. Chapter-*  
49 549 *Approaches to economic evaluation*. 2003: CRC Press.
- 50 550 44. Harris, P.A., et al., *Research electronic data capture (REDCap)—a metadata-driven*  
51 551 *methodology and workflow process for providing translational research informatics support*.  
52 552 *Journal of biomedical informatics*, 2009. **42**(2): p. 377-381.

- 1  
2  
3 553 45. Harris, P.A., et al., *The REDCap consortium: Building an international community of software*  
4 554 *platform partners*. *Journal of biomedical informatics*, 2019. **95**: p. 103208.  
5  
6 555  
7  
8  
9  
10  
11  
12  
13  
14  
15  
16  
17  
18  
19  
20  
21  
22  
23  
24  
25  
26  
27  
28  
29  
30  
31  
32  
33  
34  
35  
36  
37  
38  
39  
40  
41  
42  
43  
44  
45  
46  
47  
48  
49  
50  
51  
52  
53  
54  
55  
56  
57  
58  
59  
60

For peer review only

1  
2  
3  
4  
5  
6  
7  
8  
9  
10  
11  
12  
13  
14  
15  
16  
17  
18  
19  
20  
21  
22  
23  
24  
25  
26  
27  
28  
29  
30  
31  
32  
33  
34  
35  
36  
37  
38  
39  
40  
41  
42  
43  
44  
45  
46

Table 1: The table shows the assessment and follow up schedule

| Observation/Investigation             | Screening/<br>Baseline<br>assessments | Randomisation | 12 weeks of study participation |                                           |
|---------------------------------------|---------------------------------------|---------------|---------------------------------|-------------------------------------------|
|                                       |                                       |               | Hospital based Pulmonary Rehab  | Follow-up phase of homebased<br>exercises |
|                                       |                                       |               | End of 6 weeks of PR            | End of 6 weeks of home exercises          |
| Written informed consent              | X                                     | X             |                                 |                                           |
| Demographics                          | X                                     | X             |                                 |                                           |
| Medical history                       | X                                     | X             |                                 |                                           |
| Clinical exam                         | X                                     | X             |                                 |                                           |
| Chest X-ray                           | X                                     |               |                                 |                                           |
| Spirometry                            |                                       | X             |                                 |                                           |
| MRC dyspnoea grade                    | X                                     |               | X                               | X                                         |
| Assess symptoms                       | X                                     |               | X                               | X                                         |
| Incremental Shuttle Walk Test         | X                                     |               | X                               | X                                         |
| Endurance Shuttle Walk Test           | X                                     |               | X                               | X                                         |
| Borg breathlessness scale             | X                                     |               | X                               | X                                         |
| Mid Upper Arm Circumference           | X                                     |               | X                               | X                                         |
| Sit-to-stand time                     | X                                     |               | X                               | X                                         |
| COPD Assessment Test                  |                                       | X             | X                               | X                                         |
| Clinical COPD Questionnaire           |                                       | X             | X                               | X                                         |
| Patient Health Questionnaire          |                                       | X             | X                               | X                                         |
| HADS                                  |                                       | X             | X                               | X                                         |
| WPAI                                  |                                       | X             | X                               | X                                         |
| Physical Activity (Actigraph monitor) |                                       | X             | X                               | X                                         |
| Cost/Benefit Analysis                 |                                       | X             | X                               | X                                         |
| EQ-5D-5L Questionnaire                |                                       | X             | X                               | X                                         |

1  
2  
3  
4  
5  
6  
7  
8  
9  
10  
11  
12  
13  
14  
15  
16  
17  
18  
19  
20  
21  
22  
23  
24  
25  
26  
27  
28  
29  
30  
31  
32  
33  
34  
35  
36  
37  
38  
39  
40  
41  
42  
43  
44  
45  
46  
47  
48  
49  
50  
51  
52  
53  
54  
55  
56  
57  
58  
59  
60

For peer review only



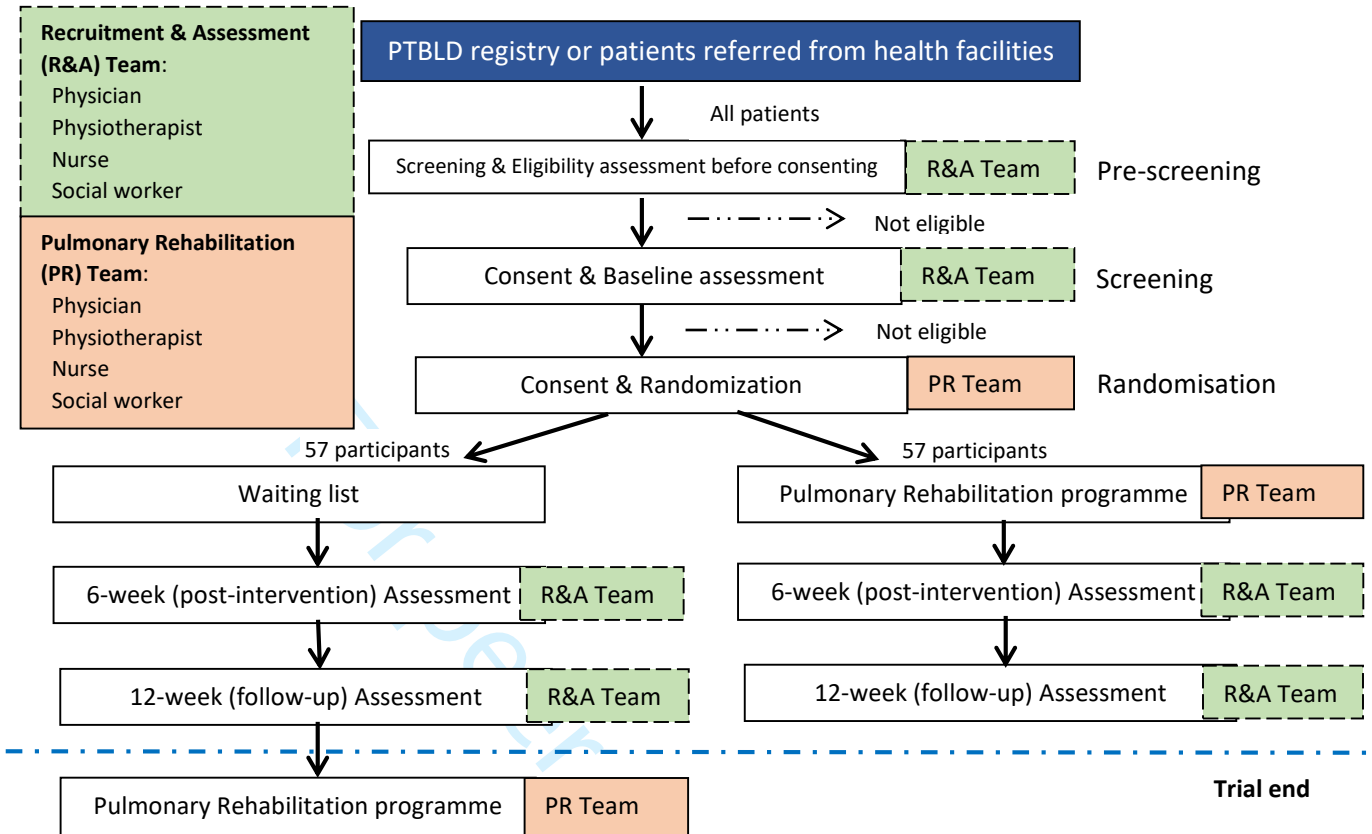

Figure 1: Figure showing the study flow in the Post TB Pulmonary Rehabilitation trial

**Legend:** PTBLD-post-TB lung disease; PR – Pulmonary Rehabilitation; R&A – Recruitment and Assessment

**Supplementary Table 1: Physical activity data collection and accelerometry processing criteria**

| Criteria                                   | Details                                                                                                                                                                                                                                |
|--------------------------------------------|----------------------------------------------------------------------------------------------------------------------------------------------------------------------------------------------------------------------------------------|
| <b>Accelerometer Model</b>                 | ActiGraph wGT3X-BT (version 6.13.4; firmware 1.9.2)                                                                                                                                                                                    |
| <b>Serial number range</b>                 | Twenty unique devices will be used; ranging from MOS2E09190617 to MOS2E25190750 and averaging six deployments per device (same serial used for baseline and follow-up wear periods to remove any inter-device variability)             |
| <b>Piezosensor orientation</b>             | Triaxial                                                                                                                                                                                                                               |
| <b>Mode setup</b>                          | Mode 29 (x, y, z, steps, lux)                                                                                                                                                                                                          |
| <b>Original sample rate</b>                | 100 Hz (.gt3x file format)                                                                                                                                                                                                             |
| <b>Deployment method</b>                   | Baseline:<br>Fitted by research team on Day 0 (Baseline PR Assessment)<br>Fitted by participant on Day 1<br>Follow-up:<br>Fitted by research team Day 0 (11 <sup>th</sup> /12 <sup>th</sup> session)<br>Fitted by participant on Day 1 |
| <b>Location worn</b>                       | Anterior hip adjacent to the mid-line of the thigh                                                                                                                                                                                     |
| <b>Requested days of wear</b>              | 7 days of free-living (10,080 epochs)                                                                                                                                                                                                  |
| <b>Initialization</b>                      | Not deployed in delay mode in order to standardised capture of Day 0 (00:00) with stop time based on date of first PR class (baseline) and date of follow-up assessment                                                                |
| <b>Wear instructions</b>                   | Wear continuously except for sleep and water-based activities                                                                                                                                                                          |
| <b>Non-wear appropriation</b>              | ≥60 min of consecutive 0s with allowance for 2 minutes of interruptions                                                                                                                                                                |
| <b>Valid day criteria</b>                  | ≥8 hours of valid waking wear time                                                                                                                                                                                                     |
| <b>Valid file</b>                          | ≥4 valid days for each of the two time points                                                                                                                                                                                          |
| <b>Missing data</b>                        | Data modelling or imputation will not be performed                                                                                                                                                                                     |
| <b>Epoch length</b>                        | 60 seconds                                                                                                                                                                                                                             |
| <b>Intensity classification (absolute)</b> | Uniaxial (x-axis) intensity cut-points as follows: Stationary <100 cpm; Light 100-2019 cpm; Moderate 2020-5998cpm; Vigorous ≥5999cpm (Moderate-to-vigorous ≥2020 cpm)                                                                  |
| <b>Intensity classification (relative)</b> | Uniaxial (x-axis) cut-points based on Endurance Shuttle Walk Test performance                                                                                                                                                          |

PR – Pulmonary Rehabilitation

**Supplementary Table 2: A list of warm up and cool down activities during PR session**

1. Marching on the spot, slowly bringing the feet off the floor for up to 1 minute
2. Heel digs: alternate heel digs in front of the body with toes pointing to the ceiling, add in a biceps curl (repeat 10-12 times).
3. Toe taps: Tap the toes to the floor in front of alternating legs at a comfortable distance. Heels stay off the ground (repeat 10-12 times).
4. High knee marching – with opposite hand to opposite knee.
5. Side bends: With arms relaxed by your side, leaning over to the right for 8 to 10 seconds and back to centre, then lean to the left for 8 to 10 seconds and back to the centre (repeat 8 times).
6. Arms stretched up, forwards and down.
7. Alternate punching of arms forward.
8. Seated or standing side taps to the floor with the foot – alternate legs.
9. Seated or standing in upright posture, feet placed shoulder breadth apart – shoulder roll in both directions (clockwise and anti-clockwise).
10. Seated or standing in upright posture, feet placed shoulder breath apart, elbows bent with hands onto shoulder – elbows make circles in clockwise and anti-clockwise.
11. Hamstring stretch: With right leg straight, place it in front of the body, heel pushed into the floor with toes pointing toward the ceiling. Slightly bend the left knee, place hands on the straight right leg and gently lean forward. Hold the stretch for 10-15 seconds then return to upright position. Repeat on left leg.
12. Quadriceps stretch: While holding a chair or onto a wall, stand on your left leg and grab your right foot using your right hand, pulling it gently towards the ceiling. Hold the position for 10-15 seconds and return to upright position and repeat on the right leg.

PR – Pulmonary Rehabilitation

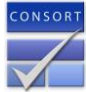

## CONSORT 2010 checklist of information to include when reporting a randomised trial\*

| Section/Topic                    | Item No | Checklist item                                                                                                                                                                              | Reported on page No |
|----------------------------------|---------|---------------------------------------------------------------------------------------------------------------------------------------------------------------------------------------------|---------------------|
| <b>Title and abstract</b>        |         |                                                                                                                                                                                             |                     |
|                                  | 1a      | Identification as a randomised trial in the title                                                                                                                                           | 1                   |
|                                  | 1b      | Structured summary of trial design, methods, results, and conclusions (for specific guidance see CONSORT for abstracts)                                                                     | 2                   |
| <b>Introduction</b>              |         |                                                                                                                                                                                             |                     |
| Background and objectives        | 2a      | Scientific background and explanation of rationale                                                                                                                                          | 3,4                 |
|                                  | 2b      | Specific objectives or hypotheses                                                                                                                                                           | 4                   |
| <b>Methods</b>                   |         |                                                                                                                                                                                             |                     |
| Trial design                     | 3a      | Description of trial design (such as parallel, factorial) including allocation ratio                                                                                                        | 4,5                 |
|                                  | 3b      | Important changes to methods after trial commencement (such as eligibility criteria), with reasons                                                                                          | 15                  |
| Participants                     | 4a      | Eligibility criteria for participants                                                                                                                                                       | 5,6                 |
|                                  | 4b      | Settings and locations where the data were collected                                                                                                                                        | 5                   |
| Interventions                    | 5       | The interventions for each group with sufficient details to allow replication, including how and when they were actually administered                                                       | 6,7,8               |
| Outcomes                         | 6a      | Completely defined pre-specified primary and secondary outcome measures, including how and when they were assessed                                                                          | 9,10,11,12          |
|                                  | 6b      | Any changes to trial outcomes after the trial commenced, with reasons                                                                                                                       |                     |
| Sample size                      | 7a      | How sample size was determined                                                                                                                                                              | 7                   |
|                                  | 7b      | When applicable, explanation of any interim analyses and stopping guidelines                                                                                                                |                     |
| <b>Randomisation:</b>            |         |                                                                                                                                                                                             |                     |
| Sequence generation              | 8a      | Method used to generate the random allocation sequence                                                                                                                                      | 6                   |
|                                  | 8b      | Type of randomisation; details of any restriction (such as blocking and block size)                                                                                                         |                     |
| Allocation concealment mechanism | 9       | Mechanism used to implement the random allocation sequence (such as sequentially numbered containers), describing any steps taken to conceal the sequence until interventions were assigned | 6                   |
| Implementation                   | 10      | Who generated the random allocation sequence, who enrolled participants, and who assigned participants to interventions                                                                     |                     |
| Blinding                         | 11a     | If done, who was blinded after assignment to interventions (for example, participants, care providers, those                                                                                | 7,8                 |

|    |                          |                                                                                                                     |       |
|----|--------------------------|---------------------------------------------------------------------------------------------------------------------|-------|
| 1  |                          | assessing outcomes) and how                                                                                         |       |
| 2  |                          | 11b If relevant, description of the similarity of interventions                                                     |       |
| 3  | Statistical methods      | 12a Statistical methods used to compare groups for primary and secondary outcomes                                   | 13,14 |
| 4  |                          | 12b Methods for additional analyses, such as subgroup analyses and adjusted analyses                                |       |
| 5  |                          |                                                                                                                     |       |
| 6  | <b>Results</b>           |                                                                                                                     |       |
| 7  | Participant flow (a      | 13a For each group, the numbers of participants who were randomly assigned, received intended treatment, and        |       |
| 8  | diagram is strongly      | were analysed for the primary outcome                                                                               |       |
| 9  | recommended)             | 13b For each group, losses and exclusions after randomisation, together with reasons                                |       |
| 10 | Recruitment              | 14a Dates defining the periods of recruitment and follow-up                                                         |       |
| 11 |                          | 14b Why the trial ended or was stopped                                                                              |       |
| 12 | Baseline data            | 15 A table showing baseline demographic and clinical characteristics for each group                                 |       |
| 13 | Numbers analysed         | 16 For each group, number of participants (denominator) included in each analysis and whether the analysis was      |       |
| 14 |                          | by original assigned groups                                                                                         |       |
| 15 | Outcomes and             | 17a For each primary and secondary outcome, results for each group, and the estimated effect size and its           |       |
| 16 | estimation               | precision (such as 95% confidence interval)                                                                         |       |
| 17 |                          | 17b For binary outcomes, presentation of both absolute and relative effect sizes is recommended                     |       |
| 18 | Ancillary analyses       | 18 Results of any other analyses performed, including subgroup analyses and adjusted analyses, distinguishing       |       |
| 19 |                          | pre-specified from exploratory                                                                                      |       |
| 20 | Harms                    | 19 All important harms or unintended effects in each group (for specific guidance see CONSORT for harms)            |       |
| 21 |                          |                                                                                                                     |       |
| 22 | <b>Discussion</b>        |                                                                                                                     |       |
| 23 | Limitations              | 20 Trial limitations, addressing sources of potential bias, imprecision, and, if relevant, multiplicity of analyses |       |
| 24 | Generalisability         | 21 Generalisability (external validity, applicability) of the trial findings                                        |       |
| 25 | Interpretation           | 22 Interpretation consistent with results, balancing benefits and harms, and considering other relevant evidence    |       |
| 26 |                          |                                                                                                                     |       |
| 27 | <b>Other information</b> |                                                                                                                     |       |
| 28 | Registration             | 23 Registration number and name of trial registry                                                                   | 3     |
| 29 | Protocol                 | 24 Where the full trial protocol can be accessed, if available                                                      |       |
| 30 | Funding                  | 25 Sources of funding and other support (such as supply of drugs), role of funders                                  | 1,16  |
| 31 |                          |                                                                                                                     |       |

36  
37 \*We strongly recommend reading this statement in conjunction with the CONSORT 2010 Explanation and Elaboration for important clarifications on all the items. If relevant, we also  
38 recommend reading CONSORT extensions for cluster randomised trials, non-inferiority and equivalence trials, non-pharmacological treatments, herbal interventions, and pragmatic trials.  
39 Additional extensions are forthcoming: for those and for up to date references relevant to this checklist, see [www.consort-statement.org](http://www.consort-statement.org).  
40  
41  
42

# BMJ Open

## A study protocol for a randomised controlled trial assessing the impact of Pulmonary Rehabilitation on maximal exercise capacity for adults living with Post-TB lung disease: Global RECHARGE Uganda

|                                 |                                                                                                                                                                                                                                                                                                                                                                                                                                                                                                                                                                                                                                                                                                                                                                                                                                                                                                                                                                                                                                                                                                                                      |
|---------------------------------|--------------------------------------------------------------------------------------------------------------------------------------------------------------------------------------------------------------------------------------------------------------------------------------------------------------------------------------------------------------------------------------------------------------------------------------------------------------------------------------------------------------------------------------------------------------------------------------------------------------------------------------------------------------------------------------------------------------------------------------------------------------------------------------------------------------------------------------------------------------------------------------------------------------------------------------------------------------------------------------------------------------------------------------------------------------------------------------------------------------------------------------|
| Journal:                        | <i>BMJ Open</i>                                                                                                                                                                                                                                                                                                                                                                                                                                                                                                                                                                                                                                                                                                                                                                                                                                                                                                                                                                                                                                                                                                                      |
| Manuscript ID                   | bmjopen-2020-047641.R1                                                                                                                                                                                                                                                                                                                                                                                                                                                                                                                                                                                                                                                                                                                                                                                                                                                                                                                                                                                                                                                                                                               |
| Article Type:                   | Protocol                                                                                                                                                                                                                                                                                                                                                                                                                                                                                                                                                                                                                                                                                                                                                                                                                                                                                                                                                                                                                                                                                                                             |
| Date Submitted by the Author:   | 18-Apr-2021                                                                                                                                                                                                                                                                                                                                                                                                                                                                                                                                                                                                                                                                                                                                                                                                                                                                                                                                                                                                                                                                                                                          |
| Complete List of Authors:       | Katagira, Winceslaus; Makerere University, Lung Institute<br>Orme, Mark; University of Leicester, Respiratory Sciences<br>Jones, Amy; University of Leicester, Respiratory Sciences<br>Kasiita, Richard; Mulago Hospital, Kampala, Uganda, Department of Physiotherapy,<br>Rupert, Jones; University of Plymouth (UK), Faculty of Health<br>Barton, Andy; University of Plymouth (UK), Faculty of Health<br>Miah, Ruhme ; University of Leicester, Department of Respiratory Sciences<br>Manise, Adrian ; University of Leicester, Department of Respiratory Sciences<br>Matheson, Jesse; University of Sheffield, Department of Economics<br>Free, Robert; Centre for Exercise and Rehabilitation Science (CERS), NIHR Leicester Biomedical Research Centre – Respiratory, University Hospitals of Leicester NHS Trust<br>Steiner, michael ; Institute for Lung Health, NIHR Leicester Biomedical Research Centre – Respiratory, University of Leicester, Glenfield Hospital,<br>Kirenga, Bruce; Makerere University, Lung Institute<br>Singh, Sally; University Hospitals of Leicester NHS Trust, Cardiac/Pulmonary Rehabilitation |
| <b>Primary Subject Heading</b>: | Respiratory medicine                                                                                                                                                                                                                                                                                                                                                                                                                                                                                                                                                                                                                                                                                                                                                                                                                                                                                                                                                                                                                                                                                                                 |
| Secondary Subject Heading:      | Rehabilitation medicine                                                                                                                                                                                                                                                                                                                                                                                                                                                                                                                                                                                                                                                                                                                                                                                                                                                                                                                                                                                                                                                                                                              |
| Keywords:                       | Rehabilitation medicine < INTERNAL MEDICINE, Health economics < HEALTH SERVICES ADMINISTRATION & MANAGEMENT, Tuberculosis < INFECTIOUS DISEASES, Adult thoracic medicine < THORACIC MEDICINE                                                                                                                                                                                                                                                                                                                                                                                                                                                                                                                                                                                                                                                                                                                                                                                                                                                                                                                                         |
|                                 |                                                                                                                                                                                                                                                                                                                                                                                                                                                                                                                                                                                                                                                                                                                                                                                                                                                                                                                                                                                                                                                                                                                                      |

SCHOLARONE™  
Manuscripts

1  
2  
3  
4  
5  
6  
7  
8  
9  
10  
11  
12  
13  
14  
15  
16  
17  
18  
19  
20  
21  
22  
23  
24  
25  
26  
27  
28  
29  
30  
31  
32  
33  
34  
35  
36  
37  
38  
39  
40  
41  
42  
43  
44  
45  
46  
47  
48  
49  
50  
51  
52  
53  
54  
55  
56  
57  
58  
59  
60



I, the Submitting Author has the right to grant and does grant on behalf of all authors of the Work (as defined in the below author licence), an exclusive licence and/or a non-exclusive licence for contributions from authors who are: i) UK Crown employees; ii) where BMJ has agreed a CC-BY licence shall apply, and/or iii) in accordance with the terms applicable for US Federal Government officers or employees acting as part of their official duties; on a worldwide, perpetual, irrevocable, royalty-free basis to BMJ Publishing Group Ltd ("BMJ") its licensees and where the relevant Journal is co-owned by BMJ to the co-owners of the Journal, to publish the Work in this journal and any other BMJ products and to exploit all rights, as set out in our [licence](#).

The Submitting Author accepts and understands that any supply made under these terms is made by BMJ to the Submitting Author unless you are acting as an employee on behalf of your employer or a postgraduate student of an affiliated institution which is paying any applicable article publishing charge ("APC") for Open Access articles. Where the Submitting Author wishes to make the Work available on an Open Access basis (and intends to pay the relevant APC), the terms of reuse of such Open Access shall be governed by a Creative Commons licence – details of these licences and which [Creative Commons](#) licence will apply to this Work are set out in our licence referred to above.

Other than as permitted in any relevant BMJ Author's Self Archiving Policies, I confirm this Work has not been accepted for publication elsewhere, is not being considered for publication elsewhere and does not duplicate material already published. I confirm all authors consent to publication of this Work and authorise the granting of this licence.



1  
2  
3 **1 Title:** A study protocol for a randomised controlled trial assessing the impact of Pulmonary  
4 Rehabilitation on maximal exercise capacity for adults living with Post-TB lung disease:  
5 2  
6 3 Global RECHARGE Uganda

7  
8 **4 Authors**

9  
10 5 Winceslaus Katagira<sup>1</sup>, Mark W. Orme<sup>2,3</sup>, Amy V. Jones<sup>2,3</sup>, Richard Kasiita<sup>4</sup>, Rupert Jones<sup>5</sup>,  
11 6 Andy Barton<sup>5</sup>, Ruhme Miah<sup>2,3</sup>, Adrian Manise<sup>6</sup>, Jesse Matheson<sup>7</sup>, Robert C. Free<sup>3</sup>, Michael  
12 7 C. Steiner<sup>2,3</sup>, Bruce Kirenga<sup>1</sup> and Sally J. Singh<sup>2,3</sup>

13  
14 **8 Affiliations**

- 15 9 1. Makerere University Lung Institute, Kampala, Uganda  
16 10 2. Department of Respiratory Sciences, University of Leicester (UK)  
17 11 3. Centre for Exercise and Rehabilitation Science (CERS), NIHR Leicester Biomedical  
18 12 Research Centre – Respiratory, University Hospitals of Leicester NHS Trust - Leicester  
19 13 (UK)  
20 14 4. Department of Physiotherapy, Mulago Hospital, Kampala, Uganda  
21 15 5. Faculty of Health, University of Plymouth (UK)  
22 16 6. NIHR Leicester Biomedical Research Centre, University Hospitals of Leicester NHS  
23 17 Trust - Leicester (UK)  
24 18 7. Department of Economics, University of Sheffield, Sheffield, United Kingdom

25  
26  
27  
28  
29 **19 Protocol version:**

30 20 Version 1.0 July 2019

31  
32  
33  
34 **21 Funding source:**

35 22 This research was funded by the National Institute for Health Research (NIHR) (17/63/20)  
36 23 using UK aid from the UK Government to support global health research. The views expressed  
37 24 in this publication are those of the author(s) and not necessarily those of the NIHR or the UK  
38 25 Department of Health and Social Care.

39  
40  
41 **26 Roles and responsibilities of authors**

- 42 27 a) Substantially contributed to the conception and/ or design of the work  
43 28 b) Substantially contributed to the acquisition, analysis, or interpretation of data for the work  
44 29 c) Substantially contributed to the drafting of the work and/ or revising it critically for  
45 30 important intellectual content  
46 31

47  
48  
49  
50 **32 Name and contact information for corresponding author**

51 33 Katagira Winceslaus, wincegira@gmail.com

52  
53  
54 **34 Word count:** 3,998

55  
56  
57  
58  
59  
60

## 36 **Abstract**

### 37 **Introduction**

38 The burden of post-TB lung disease (PTBLD) is steadily increasing in sub-Saharan Africa,  
39 causing disability among TB survivors. Without effective medicines, the mainstay of PTBLD  
40 treatment evolves around disease prevention and supportive treatment. Pulmonary  
41 rehabilitation (PR), a low-cost, non-pharmacological intervention has shown effectiveness in a  
42 group of PTBLD individuals but has not been tested in a clinical trial. This study aims to assess  
43 the impact of a 6-week PR programme on maximal exercise capacity and other outcomes  
44 among adults in Uganda living with PTBLD.

### 45 **Methods and analysis**

46 This is a randomized waiting-list controlled trial with blinded outcome measures, comparing  
47 PR versus usual care for patients with PTBLD. A total of 114 participants will be randomized  
48 (1:1) to receive either usual care (on the waiting list) or PR, with follow-up assessments at 6-  
49 and 12-weeks post-intervention. The primary outcome is change in walking distance measured  
50 by the Incremental Shuttle Walk Test from baseline to the end of 6-weeks of PR. All secondary  
51 outcomes will be compared between the PR and usual care arms from baseline to 6- and 12-  
52 week follow-ups. Secondary outcomes include self-reported respiratory symptoms, physical  
53 activity, psychological well-being, health related quality of life and cost benefit analysis. All  
54 randomized participants will be included in the intention to treat analysis population. The  
55 primary efficacy analysis will be based on both per protocol and modified intention-to-treat  
56 populations.

### 57 **Ethics and dissemination**

58 The trial has received ethical clearance from the Mulago Hospital Research and Ethics  
59 Committee (MHREC 1478), Kampala, Uganda as well as the Uganda National Council for  
60 Science and Technology (SS 5105). Ethical approval has been obtained from the University of  
61 Leicester, United Kingdom research ethics committee (Ref No. 22349). Study findings will be  
62 published in appropriate peer-reviewed journals and disseminated at appropriate local, regional  
63 and international scientific meetings and conferences.

### 64 **Strengths and limitations of this study**

65 The study aims to determine the effectiveness of PR for individuals with PTBLD in a clinical  
66 trial setting. To our knowledge, this is the first pragmatic, fully powered effectiveness trial for

1  
2  
3 67 PR in PTBLD in Africa. This is a progression of previous work that established feasibility and  
4 68 acceptability of PR design for people living with PTBLD in Uganda.

5  
6  
7 69 Due to funding limitations, we are unable to carry out a multi-site study. This may limit  
8  
9 70 generalizability of the study findings.

10  
11  
12 71 **Trial registration:** ISRCTN18256843

13  
14 72 **Key words**

15  
16 73 Pulmonary Rehabilitation, Post-TB lung disease, Chronic Respiratory disease, non-drug  
17 74 treatment, Exercise, Education

18  
19 75

20  
21 76

22  
23 77

24  
25 78 **Introduction**

26  
27 79 **Background and rationale**

28  
29 80 In 2018, 24% of the global Tuberculosis (TB) incident cases occurred in the African region [1].  
30  
31 81 Furthermore, 24 of the 30 high TB/Human Immunodeficiency Virus (HIV) burden countries,  
32  
33 82 including Uganda, are in the African region; accounting for 71% of the global burden of HIV  
34  
35 83 associated TB [1]. Despite great strides made over the recent years to achieve the 90%  
36  
37 84 treatment success rate, as part of the “End TB strategy” target [1], a significant number of TB  
38  
39 85 survivors continue to have poor health related quality of life [2]. This may be attributed to the  
40  
41 86 pulmonary function impairment following TB treatment which has been reported in  
42  
43 87 approximately 50% of pulmonary TB survivors [3]. The reduction in ventilation and perfusion  
44  
45 88 attributed to the permanent lung parenchymal damage [4] clinically manifests as long-term  
46  
47 89 respiratory symptoms and eventually chronic respiratory disease (CRD), including chronic  
48  
49 90 obstructive pulmonary disease (COPD), bronchiectasis and aspergillosis [5, 6].

50  
51 91 Adults with post-TB respiratory symptoms develop skeletal muscle dysfunction, related to  
52  
53 92 physical inactivity and systemic inflammation, which is often compounded by impaired  
54  
55 93 nutrition and poverty [7]. Such patients enter a vicious cycle with falling body weight,  
56  
57 94 progressive morbidity and increased mortality [7]. Individuals affected by CRDs tend to avoid  
58  
59 95 exercise and become increasingly deconditioned and demotivated, leading to a cycle of decline.  
60  
96 There are no effective medicines for post-TB lung disease (PTBLD) and the mainstay of

1  
2  
3 97 treatment evolves around disease prevention and supportive treatment. The disease, previously  
4 98 neglected by health services and researchers, is now the focus of increasing interest [8, 9].

7 99 In low- and middle-income countries (LMIC) where health care focuses on treatment and  
8  
9 100 prevention of infectious diseases, as opposed to managing chronic diseases, the care for adults  
10  
11 101 living with CRD presents a major challenge. Consequently, patients that require long-term and  
12  
13 102 systemic approaches often receive sub-optimal medical care, inevitably leading to preventable  
14  
15 103 deaths in resource poor settings.

16 104 Pulmonary Rehabilitation (PR) is a low cost, high impact intervention that reverses the  
17  
18 105 disability associated with CRDs, and is supported by the highest level of research evidence in  
19  
20 106 high income countries [10, 11]. A PR programme brings together health professionals from  
21  
22 107 many disciplines offering supervised exercise training and disease education, supporting  
23  
24 108 people to manage their own disease. However, in LMIC where the burden of CRDs is  
25  
26 109 increasing fastest, PR is scarce and health care services are poorly adapted to deal with such  
27  
28 110 diseases. Although PR is a grade “A” evidence treatment for adults with COPD [12] and has  
29  
30 111 been utilized in other chronic lung diseases [13], it’s efficacy in Post TB lung disease is not  
31  
32 112 known. In a development study to examine the impact of PR for people with PTBLD in  
33  
34 113 Uganda, it was feasible to run a PR programme and participants reported clinically important  
35  
36 114 improvements in quality of life, exercise capacity, and respiratory outcomes [14]. To date, there  
37  
38 115 has been little attention to the role of PR in PTBLD globally, particularly in Africa where a  
39  
40 116 significant number of PTB survivors reside.

### 41 117 **Study Objectives**

42 118 The primary objective of this trial is to assess the impact of a 6-week PR programme on  
43  
44 119 maximal exercise capacity using the incremental shuttle walking test (ISWT) among adults  
45  
46 120 living with PTBLD post-intervention.

47 121 The secondary objectives include assessing the impact of PR on quality of life and other  
48  
49 122 outcomes for patients with Post-TB lung disease, and to conduct a cost-benefit analysis of PR.

### 51 123 **Methods**

#### 53 124 **Study design**

54  
55 125 This is a prospective, randomised waiting-list controlled trial with blinded outcome measures,  
56  
57 126 comparing PR versus usual care for patients with post-TB lung disease. During this  
58  
59 127 effectiveness trial, a total of 114 participants will be randomized (1:1) to receive either usual  
60  
128 care (waiting-list) or PR (Figure 1).

## 129 **Study setting**

130 The study is conducted at the PR centre located at the Makerere University Lung Institute  
131 (MLI) Clinic, Kampala, Uganda. The MLI clinic is an academic outpatient clinic within the  
132 Mulago National Referral hospital, a teaching and clinical research hospital for Makerere  
133 University.

## 134 **Study population**

### 135 **Recruitment**

136 Adults with PTBLD will be referred from health facilities and clinics (TB treatment centres  
137 and HIV/TB caring centres) around Kampala to the PR centre. Existing registers have around  
138 300 adults living with PTBLD and additional patients will be screened directly from the  
139 outpatient departments.

140 In this study, a patient is considered to have post-TB lung disease (PTBLD) if they successfully  
141 completed treatment for microbiologically confirmed Pulmonary TB but continue to  
142 experience chronic respiratory symptoms with radiological evidence of lung parenchymal  
143 damage.

### 144 **Participant invitation**

145 The process of identifying and inviting eligible patients was refined in the development study.  
146 Eligible individuals identified as having an established PTBLD diagnosis will be received at  
147 the PR centre at the MLI. Literate participants will be asked to read the patient information  
148 sheet (PIS) about the study, written in English or translated in the local language. Illiterate  
149 participants will have the contents read to them in full by a study staff, in the presence of a  
150 witness who will be present during the whole process. Participants will have the opportunity to  
151 discuss the PIS with the study medical personnel. Once the study staff are satisfied that the  
152 participant has understood the PIS, and is interested in taking part in the study, they will be  
153 taken through the informed consent process. Participants will give consent before undergoing  
154 screening tests and procedures, and if still eligible after the screening process, will be taken  
155 through another informed consent process for randomisation.

### 156 **Eligibility criteria**

#### 157 ***Inclusion criteria***

158 A patient with PTBLD is eligible for the trial if they meet all of the following criteria: aged  
159  $\geq 18$  years, willing and able to provide written informed consent (signed or witnessed consent  
160 if the patient is illiterate), a documented past history of smear positive pulmonary TB with

1  
2  
3 161 treatment completed  $\geq 6$  months prior to study enrolment, a negative Xpert MTB/RIF assay for  
4 162 *Mycobacterium tuberculosis* at the time of study enrolment, and report a Medical Research  
5 163 Council (MRC) dyspnoea grade  $\geq 2$ .

### 164 **Exclusion criteria**

165 A PTBLD patient is ineligible for the study if they have co-morbidities that preclude exercise  
166 (e.g. known unstable cardiovascular disease, locomotor difficulties) or if they are unwilling to  
167 participate for any reason or had any condition (social or medical) which in the opinion of the  
168 investigator would make study participation unsafe.

### 169 **Randomization**

170 Once eligible participants have consented to take part in the study, they will be randomised  
171 using a web-based randomisation system (<https://www.sealedenvelope.com/>). Participants will  
172 be randomized (1:1) to receive either usual care or PR. Access to the web-based system will be  
173 controlled through an authorised username and password. Randomisations will be conducted  
174 by a member of the study team independent from the data collection team and will be revealed  
175 to the data collection and intervention delivery teams after baseline measurements have been  
176 obtained.

### 177 **Participant timeline**

178 After randomisation, the PR team will explain to participants when the PR sessions will take  
179 place. For each individual participant, the hospital based PR programme will last six weeks  
180 followed by a follow-up period of six weeks of home exercises. Participants in the control arm  
181 (waiting-list) of the trial will be informed of the date for their first exercise session in  
182 approximately 12-15 weeks. Based on our development study [15], we expect to find prolonged  
183 and possibly improved effects of PR at follow-up. Our experience indicates that a follow-up  
184 period of more than three months after the start of the PR programme would be unrealistic in  
185 this environment without unacceptable attrition. Study participants will receive compensation  
186 for their time and transport.

### 187 **Pulmonary Rehabilitation Team**

188 The PR team has received adequate training on the delivery of PR and participated in the  
189 development study which informed this trial [14]. Furthermore, the individuals are registered  
190 health professionals (physiotherapist, physicians, and nurses) and have undertaken training  
191 regarding the study tests, procedures and measurements per protocol as well as Good Clinical  
192 Practice.



### 193 **Assessment and follow up**

194 Participants in both arms of the trial will be asked to attend the baseline, 6-week and 12-week  
195 post-intervention assessment visits at the PR centre at MLI. Data will be collected by the study  
196 staff (medical doctor, nurse and physiotherapist). Table 1 shows all baseline and follow up  
197 assessment data that will be collected during the trial, in accordance with a minimum  
198 recommended dataset for PR trials in LMIC[16].

### 199 **Study procedures**

200 During the screening visit, prospective participants will undergo clinical examination, MRC  
201 dyspnoea grading, sputum examination using Xpert MTB/RIF assay and a frontal chest  
202 radiograph. In addition, demographic, socio-economic, medical and clinical history (including  
203 respiratory symptoms and exposure history to cigarettes and biomass) will be collected using  
204 a standardised questionnaire. At the randomisation visit, spirometry will be performed using  
205 American Thoracic Society and European Respiratory Society guidelines [17].

### 206 **Sample size**

207 The study will be powered to detect a 35m difference in the ISWT measured at baseline and  
208 after completion of PR[18]. Assuming that ISWT follows an approximately normal  
209 distribution, a power calculation based on a paired t-test was performed. Based on a trial sample  
210 size of 40 participants in each of the treatment and control groups, a 2-sided 5% significance  
211 level and a statistical power of 80%, the clinically important change in ISWT of 35m will also  
212 be statistically significant. Our recent feasibility study [15] was used to obtain an estimate of  
213 the pooled standard deviation for the power calculation. Conservatively assuming up to 30%  
214 loss to follow-up at 6-weeks, a total of 114 participants are required to be recruited and  
215 randomised (1:1) to each arm (PR: 57 participants or waiting list: 57 participants). Using the  
216 70% ineligibility rate during screening from the feasibility study, we will need to screen  
217 approximately 543 PTBLD patients.

### 218 **Blinding (masking)**

219 Due to the nature of PR, it will not be possible to blind participants to their group allocation  
220 but participants will be asked not to reveal their group during the follow-up assessments. The  
221 participant and treating clinician will be aware of treatment allocation, however, the outcome  
222 measures will be performed by staff blinded to treatment allocation and the ISWT (primary  
223 outcome) will be prioritised to reduce the risk of un-blinding. Any episodes of un-blinding will  
224 be documented and reported.

## 225 **Treatment arms**

### 226 *Usual care (control arm)*

227 The participants in the waiting-list (control) arm will receive usual care and will be offered PR  
228 after completing 12-weeks of follow-up. There are currently no guidelines for the clinical  
229 management of PTBLD both locally and internationally. Usual care will be optimised where  
230 possible and will include the following: frontal chest radiograph, spirometry to screen for  
231 airway diseases, inhalational therapies for airway disease amenable to treatment (where  
232 appropriate), antibiotic and systemic glucocorticoid therapy for infective exacerbations (where  
233 appropriate), and verbal advice to quit smoking and reduce exposure to biomass smoke.  
234 According to local practice, all post-TB patients with significant post-bronchodilator response  
235 on Spirometry (at least 12% and 200mls increase in forced expiratory volume in 1 second  
236 (FEV1)) are managed with a combination of inhaled corticosteroids and long-acting beta-  
237 agonists, while those with fixed airflow obstruction (post-bronchodilator FEV1/forced vital  
238 capacity (FVC) ratio of less than 0.70) are managed with long acting bronchodilators. PR will  
239 be offered as an adjunctive non-pharmacological treatment as recommended by international  
240 guidelines [19].

### 241 *Pulmonary Rehabilitation (trial intervention arm)*

242 In addition to usual care described above, participants in the intervention arm will receive PR.  
243 PR will consist of a six-week programme offered to a group of up to 12 participants, with  
244 sessions occurring twice weekly for at least two hours (approximately one hour for education  
245 and one hour for exercise).

### 246 *Warm-up and cool-down*

247 Before starting exercises, participants will be taken through a group warm up session, followed  
248 by a cool down session at the end of exercises, each lasting 10-15 minutes. Warm up is aimed  
249 at readying the body for both the physical aspects of performance (increased blood flow and  
250 muscle temperature) and mental readiness for exercise whilst cool down session facilitates a  
251 smoother decline in temperature and blood flow [20] Both warm up and cool down will consist  
252 of stretching and flexibility exercises during which participants will perform both upper and  
253 lower body flexibility exercises, held for 10 to 15 seconds each (including stretching of major  
254 muscle groups such as the calves, hamstrings, quadriceps, and biceps, as well as range of  
255 motion exercises for the neck, shoulders, and trunk), 2 days/week[13]. The cool down session  
256 has the same activities of warm-up (supplementary table 1) but performed at a slower pace.



1  
2  
3 257 ***Endurance training***  
4

5 258 Each participant will go through two stations of endurance exercise; load-adjustable stationary  
6  
7 259 cycling and ground-based walking stations. We shall employ an intensity of continuous  
8  
9 260 exercise at each station for 10 minutes or until a Borg dyspnoea score of 4-6 (moderate to [very]  
10  
11 261 severe) is attained [21, 22]. Participants who may have difficulty in sustaining continuous high-  
12  
13 262 intensity exercise will have interspersed periods of rest or lower intensity exercise to maximise  
14  
15 263 the benefits of exercise training [13]. The walking exercise regime will be individually  
16  
17 264 prescribed to participants based around their performance in the ISWT. Participants will be  
18  
19 265 encouraged to walk at 85% of their maximal ISWT walking speed [23].

19 266 ***Strength training***  
20

21 267 Each participant will go through two stations for strengthening upper limb muscles (pull-ups  
22  
23 268 and biceps curls) and two for strengthening lower limb muscles (sit-to-stand and step-up  
24  
25 269 exercises). Each of the stations will include 3 sets of 8-12 repetitions. Participants will be asked  
26  
27 270 to continue doing both endurance and resistance exercises at home, unsupervised.

28  
29 271 **Education sessions**

30 272 A dedicated education session will be conducted at the start of each class, before the exercise  
31  
32 273 regimes (Table 2; 12 sessions in total).  
33

34 **Table 2: Education content of the Global RECHARGE Pulmonary Rehabilitation**  
35 **programme**

- |                                                                                                                                                                                                                                                                                                                                                                                                                                                                                                                                                                                                                                                                                                                                                                                                                                           |
|-------------------------------------------------------------------------------------------------------------------------------------------------------------------------------------------------------------------------------------------------------------------------------------------------------------------------------------------------------------------------------------------------------------------------------------------------------------------------------------------------------------------------------------------------------------------------------------------------------------------------------------------------------------------------------------------------------------------------------------------------------------------------------------------------------------------------------------------|
| <p>36</p> <ol style="list-style-type: none"> <li>37 1. Normal anatomy and physiology of the lungs</li> <li>38 2. Pathophysiology of chronic lung disease</li> <li>39 3. Tuberculosis and how it causes lung damage</li> <li>40 4. Coping with chronic lung disease and coping with stress</li> <li>41 5. Avoidance of risk factors for chronic lung disease</li> <li>42 6. Early recognition and treatment of exacerbations</li> <li>43 7. Strategies for managing breathlessness</li> <li>44 8. Energy conservation during activities of daily living</li> <li>45 9. Role and rationale for medications and devices</li> <li>46 10. Benefit of exercise and physical activities</li> <li>47 11. Healthy food intake</li> <li>48 12. Secretion clearance techniques</li> </ol> <p>49<br/>50<br/>51<br/>52<br/>53<br/>54<br/>55<br/>56</p> |
|-------------------------------------------------------------------------------------------------------------------------------------------------------------------------------------------------------------------------------------------------------------------------------------------------------------------------------------------------------------------------------------------------------------------------------------------------------------------------------------------------------------------------------------------------------------------------------------------------------------------------------------------------------------------------------------------------------------------------------------------------------------------------------------------------------------------------------------------|

57  
58 274  
59  
60

## 275 **Study Outcomes**

### 276 **Primary outcome**

277 The primary outcome is change in walking distance measured by the ISWT from pre to post-  
278 intervention. A group change of at least 35m is considered clinically important [18].

### 279 **Incremental Shuttle Walking Test**

280 The ISWT is frequently used as an outcome measure for PR [24]. Improvement in walking  
281 distance of 35m during the post-PR shuttle test, measured from baseline (pre-PR) using the  
282 ISWT is considered a clinically important difference [18]. The ISWT requires the patient to  
283 walk up and down a 10-meter course, identified by two cones inset 0.5m from either end to  
284 avoid the need for abrupt changes in direction. The speed at which the patient walks is dictated  
285 by an audio signal played on an audio device. Each participant will receive standardised  
286 instructions to: "Walk at a steady pace, aiming to turn around when you hear the signal. You  
287 should continue to walk until you feel that you are unable to maintain the required speed  
288 without becoming unduly breathless" [25]. To ensure the learning effect is accounted for, a  
289 practice ISWT will be performed and the participant will receive encouragement from the  
290 physiotherapist throughout the test in an effort to increase the distance one can walk. The test  
291 is terminated when either 1) the patient indicates that they are unable to continue, 2) if the  
292 operator determines that the patient is not fit to continue, or 3) the operator assesses that the  
293 patient was unable to sustain the speed and cover the distance to the cone prior to the beep  
294 sounding [25].

### 295 **Secondary outcomes**

296 All secondary outcomes will be compared between the PR and usual care arms from baseline  
297 to 6-week and 12-week follow-ups.

298 Health questionnaires will be administered including COPD assessment test (CAT), Clinical  
299 COPD questionnaire (CCQ), Hospital Anxiety and Depression Scale (HADS), Patient Health  
300 Questionnaire (PHQ-9), Work Productivity and Activity Impairment (WPAI), and European  
301 Quality of Life 5-Dimensions (EQ-5D-5L). Pulmonary rehabilitation specific measurements  
302 will include the ISWT, Endurance Shuttle Walking Test (ESWT), mid upper arm  
303 circumference (MUAC) and sit-to-stand test.

### 304 **Respiratory symptoms**

305 The CCQ is a simple 10-item validated health related quality of life (HRQoL) questionnaire  
306 with good psychometric properties [26]. It consists of 10 items, each scored between 0-6,

1  
2  
3 307 divided into three domains (symptoms, functional, mental), with higher scores representing  
4  
5 308 worse HRQoL. The CCQ is responsive to PR with an estimated minimal important  
6  
7 309 improvement of 0.4 [27].

8  
9 310 The CAT is a validated, self-administered, short and simple questionnaire that measures  
10  
11 311 HRQoL [28]. The CAT consists of eight items, each scored between 0-5 scored with a range  
12  
13 312 of 0-40; scores of 0-10, 11-20, 21-30, 31-40 representing mild, moderate, severe or very severe  
14  
15 313 negative impact on HRQoL, respectively. The CAT is responsive to the effects of PR with an  
16  
17 314 estimated minimal clinically important difference (MCID) of 2 points [29].

### 18 315 **Psychological wellbeing**

19  
20 316 The HADS questionnaire is a validated, easy to use screening tool for anxiety and depression  
21  
22 317 symptoms in a hospital outpatient setting [30]. The self-report rating scale is composed of 14  
23  
24 318 items with two 7-item subscales (HADS-Anxiety and HADS-Depression), both ranging from  
25  
26 319 0-21 with higher scores indicating more severe distress. The HADS is responsive to PR with  
27  
28 320 estimated MCID of 2 points on each subscale [31, 32].

28  
29 321 The PHQ-9 is a nine item, validated, short, self-administered, and positively worded  
30  
31 322 questionnaire designed to measure the severity of depression over the last 2 weeks [33]. The  
32  
33 323 total score ranges from 0-27, with high scores indicating high depression, specifically; no  
34  
35 324 depression (0-4), mild (5-9), moderate (10-14), moderately severe (15-19), or severe  
36  
37 325 depression (20-27) [33]. The PHQ-9 has an estimated MCID of 5 points [34].

### 38 326 **Work productivity and impairment**

39  
40 327 The WPAI questionnaire is a validated instrument to measure impairments in work and  
41  
42 328 activities, both paid and unpaid. The WPAI self-administered questionnaire measures time  
43  
44 329 missed from work, impairment of work and regular activities due to overall health and  
45  
46 330 symptoms, during the past seven days [35]. We have added two follow-up supplementary  
47  
48 331 questions, following the WPAI format, to measure productivity with respect to regular  
49  
50 332 household duties in low resource settings.

### 51 333 **Health Related Quality of Life**

52  
53 334 The EQ-5D-5L questionnaire is a standardised questionnaire, developed to measure of health  
54  
55 335 outcomes and defines health in terms of five dimensions: mobility, self-care, usual activities,  
56  
57 336 pain or discomfort and anxiety or depression [36]. The questionnaire also contains a visual  
58  
59 337 analogue scale. The EQ-5D-5L will be used to calculate patient costs per quality adjusted life  
60

338 year (QALY). EQ-5D-5L is responsive to change following PR, with a MCID of 0.05 (utility  
339 index) and 7.0 (visual analogue scale) [37].

### 340 **Exercise capacity/ physical function**

341 The five-repetition sit-to-stand test (FTSTS) is a commonly used functional performance  
342 measure of lower-limb strength [38]. The FTSTS measures the time taken to stand five times  
343 from a sitting position as rapidly as possible. The FTSTS is reliable, valid and responsive to  
344 PR with an estimated MCID of 1.7 seconds [39].

345 The MRC dyspnoea scale is a 5-point self-administered questionnaire based on the sensation  
346 of breathing difficulty experienced by the patient during daily life activities. The questionnaire  
347 is short, easy to use and has grades ranging from 1 (none) to 5 (almost complete incapacity),  
348 with high grades indicating high perceived respiratory disability[40]. The MRC dyspnoea scale  
349 is responsive to PR with estimated MCID of 1 points [41, 42].

350 The ESWT is a constant-load exercise test which measures the ability of the participant to  
351 sustain a given sub-maximal exercise capacity; the participant aims to walk at 85% of their  
352 maximal ISWT walking speed [23]. The ESWT is frequently used as an exercise tolerance  
353 outcome measure for PR. The endpoint of the test is the time the participant walks at the  
354 constant endurance speed. The test consists of pre-recorded audio signals at different  
355 frequencies giving a total of 16 walking speeds. The ESWT is responsive to PR with MCID  
356 following a 6-week PR programme between 174-279 seconds [43].

### 357 **Physical activity (PA)**

358 Participants will be asked to wear an ActiGraph wGT3X-BT activity monitor (ActiGraph,  
359 Pensacola, FL, USA), able to detect a range of PA intensities [44]. Participants will be  
360 instructed to wear the PA monitor on the right anterior hip during waking hours for one week  
361 prior to attending PR (pre-intervention) and for one week prior to their post-intervention  
362 assessment (supplementary Table 2). Written instructions to follow will be provided to the  
363 participants prior to wearing and using the PA monitors.

### 364 **Cost/benefit analysis**

365 The cost of starting and running a PR program will include single and recurrent costs (Table  
366 3). Single payments will include the necessary costs needed to set up and run PR. Recurrent  
367 costs refer to any item with a life expectancy of  $\leq 1$  year (e.g. disposable materials) [45]. The  
368 fixed costs will be captured prior to enrolling the first participant into the PR programme and

369 the recurrent costs will be collected at the mid-stage of recruitment. The average fixed and  
 370 recurrent costs will be calculated separately.

371 **Table 3: Table showing the variables used to calculate fixed and recurrent costs (not an**  
 372 **exhaustive list)**

| Fixed costs                                                                                                                                                                                                                                                                                                                                                                                                                                                                                                                                                                                                                                                                                                                                                                                                                                                                             | Recurrent costs                                                                                                                                                                                                                                                                                                                                                                                                                                                                                     |
|-----------------------------------------------------------------------------------------------------------------------------------------------------------------------------------------------------------------------------------------------------------------------------------------------------------------------------------------------------------------------------------------------------------------------------------------------------------------------------------------------------------------------------------------------------------------------------------------------------------------------------------------------------------------------------------------------------------------------------------------------------------------------------------------------------------------------------------------------------------------------------------------|-----------------------------------------------------------------------------------------------------------------------------------------------------------------------------------------------------------------------------------------------------------------------------------------------------------------------------------------------------------------------------------------------------------------------------------------------------------------------------------------------------|
| <ul style="list-style-type: none"> <li>• Electrical equipment (laptop, printer, projector)</li> <li>• Equipment for PR (weights, treadmill, cycle ergometer, country-specific equipment, step-up box, chairs)</li> <li>• Equipment for shuttle walking tests (cones, licences, stop watches, tape measure, electrical equipment to play audio)</li> <li>• Equipment for PR assessment (height stadiometer, weight scales, sphygmomanometer, pulse oximeter, spirometer, calibration syringe, country-specific equipment)</li> <li>• Additional safety equipment (blood glucose monitor, Oxygen cylinder holder)</li> <li>• Miscellaneous (filing cabinets, storage units, questionnaire translations, questionnaire licences, staff uniform)</li> <li>• Staff time (creating core PR content including educational material, exercise diaries and other necessary paperwork)</li> </ul> | <ul style="list-style-type: none"> <li>• Staff time to conduct PR (assessment at baseline and discharge, conduct PR classes, telephone calls and data entry)</li> <li>• Disposable equipment (for blood glucose monitor, spirometer mouthpieces, nose-clips)</li> <li>• Servicing costs (spirometer, PR equipment, specifically cycle ergometers)</li> <li>• Miscellaneous (Oxygen cylinders, questionnaire licences, stationery (paper))</li> <li>• Patient costs (transport and meals)</li> </ul> |

### 373 **Patient and public involvement (PPI)**

374 Adults with CRDs tell us how they are greatly troubled by breathlessness and express interest  
 375 in attending a program that can help better manage their condition. They express interest in  
 376 attending a hospital based programme that allows them to interact with fellow patients. They  
 377 additionally tell us how the PR programme should be delivered. We have also set up a PPI  
 378 group at MLI that will meet regularly, and assist with disseminating results following the study.

379

## 380 **Data analysis**

381 All randomized participants will be included in the intention to treat analysis population. The  
382 primary efficacy analysis will be based on both per protocol and modified intention-to-treat  
383 populations. For the primary analysis, the differences in the primary outcome (walking distance  
384 on the ISWT) with the corresponding two-sided 95% confidence interval and p-value will be  
385 estimated using a stratified analysis; a p-value <0.05 will be the measure for statistical  
386 significance. Predictive analytics software (SPSS; Statistical Package for the Social Sciences)  
387 will be used to analyse the data. Continuous data will be presented as mean and standard  
388 deviation or median and interquartile ranges, whilst categorical data will be presented as  
389 frequencies and percentages. All data will be assessed for normality and appropriate parametric  
390 and non-parametric tests will be used. Categorical variables between the two treatment groups  
391 will be compared using chi-square and Fisher exact test as appropriate. Continuous variables  
392 will be compared using t-test for normally distributed data and Mann-Whitney-U test for non-  
393 normally distributed data. Any baseline differences will be adjusted for. Both intention-to-treat  
394 and per-protocol analyses will be conducted after imputing any missing data. There will be no  
395 formal interim analysis of data. The final analysis will be performed when all the 114  
396 participants have completed the last study related visit or previously withdrawn from the trial.  
397 We will fit linear mixed models for both per protocol and intention to treat analyses.

## 398 **Data management**

399 An Independent Data Monitoring Committee will be established at the University of Leicester,  
400 UK to review high level safety data (serious adverse events and adverse events) at least  
401 quarterly, and as needed on an ad hoc basis to ensure the continuing safety of the participants  
402 enrolled in this study.

403 All data collected during the trial will be entered into the Research Electronic Data Capture  
404 (REDCap) [46, 47] with access via a secure password protected web-interface hosted by the  
405 University of Leicester, UK. Study participants will be assigned a study-specific identification  
406 code.

## 407 **Ethics and dissemination**

408 The study received ethical approvals from the University of Leicester research ethics  
409 committee (United Kingdom) (Ref No. 22349) and locally from the Mulago Hospital Research  
410 and Ethics Committee (MHREC1478), Kampala, Uganda as well as the Uganda National  
411 Council for Science and Technology (SS5105).



## 412 **Confidentiality**

413 The confidentiality of all participants will be protected to the fullest extent possible. All patient  
414 information will be kept secure and will be available only to the treatment staff and  
415 representatives of the sponsors, regulators, and ethics committees.

416 All participants will be provided with a unique identification number which will be recorded  
417 in the participant enrolment log and stored in a secure place. Study participants will not be  
418 identified by name on any case report form, email or on any other documentation sent to the  
419 central database and will not be reported by name in any report, presentation or publication  
420 resulting from data collected in this study. Participants' data/specimens will be identified by  
421 study number or hospital number only.

## 422 **Dissemination**

423 Results of the study will be published in peer-reviewed journals and findings disseminated at  
424 appropriate local, regional and international scientific meetings and conferences. Social media  
425 will be used to disseminate information and summaries of results to a wider public domain.  
426 Furthermore, a participant dissemination meeting will be held following this trial, in which  
427 study participants will receive a summary of the findings.

## 428 **COVID-19 provisions**

429 Modifications will be made to the delivery of the PR program due to the Corona Virus Disease  
430 2019 (COVID-19) pandemic. The PR room will be re-organized to allow for social distancing  
431 (minimum 2-meters) for both study staff and study participants. The maximum number of  
432 participants participating in the PR session will be reduced from 12 to 8 to ensure social  
433 distancing between participants. Before accessing the PR room, all participants and staff will  
434 be required to undergo temperature measurement using a hand-held non-contact thermometer,  
435 wash hands with soap or alcohol-based hand sanitizer. All participants will be provided with  
436 face masks during PR sessions. All surfaces inside the PR room will be disinfected before and  
437 after every PR session. PR sessions will be conducted in the morning hours to allow  
438 participants travel back home in time before the evening rush hour and the standard operating  
439 procedure for data collection will be modified ensure 2-meter distancing between the study  
440 staff and study participant. Study participants will undergo COVID-19 testing before starting  
441 PR and as needed during the hospital based sessions. All study staff will be required to wear

1  
2  
3 442 N95 masks at all times and will undergo COVID-19 training with emphasis on infection  
4 443 prevention and control, and screening study participants for signs and symptoms of the disease.

5  
6  
7 444 **Figure legend**

8  
9 445 Figure 1: Figure showing the study flow in the Post TB Pulmonary Rehabilitation trial

10  
11 446 *Legend: PTBLD-post-TB lung disease; PR – Pulmonary Rehabilitation; R&A – Recruitment*  
12 *and Assessment*

13  
14  
15 448 **Contributors**

16  
17 449 SJS is the principal investigator of the Global RECHARGE project while BK is the in-country  
18 principal investigator. WK, MWO, AVJ, RK, RM, AM and RCF have been involved in drafting  
19 450 the work and revising it critically for important intellectual content. AB, RJ, MCS and JM have  
20 451 substantially contributed to the development of the intervention and the design of the trial. All  
21 452 authors have revised the content and approved the final version to be published.  
22  
23  
24 453

25  
26 454 **Competing interests**

27  
28 455 None declared

29  
30 456 **Funding and acknowledgments**

31  
32 457 This research was funded by the National Institute for Health Research (NIHR) (17/63/20)  
33 using UK aid from the UK Government to support global health research. The views expressed  
34 458 in this publication are those of the author(s) and not necessarily those of the NIHR or the UK  
35 459 Department of Health and Social Care.  
36  
37 460

38  
39 461 **Data sharing**

40 462 Following the completion of the project, data from the Global Health Research Group on  
41 Respiratory Rehabilitation (Global RECHARGE) Core Dataset [16] will be made available to  
42 463 the wider community upon reasonable request.  
43  
44  
45  
46  
47  
48  
49  
50  
51  
52  
53  
54  
55  
56  
57  
58  
59  
60



465 **References**

- 466 1. WHO, *Global tuberculosis report 2019*. 2019.
- 467 2. Dye C, H.A., Maher D, S. Hosseini SM, Nkhoma W, and Salaniponi FM., *Disease and Mortality in Sub-Saharan Africa. 2nd edition. Chapter 13. Tuberculosis*. 2006.
- 468 3. Pasipanodya, J.G., et al., *Pulmonary impairment after tuberculosis*. *Chest*, 2007. **131**(6): p. 1817-1824.
- 470 4. Harries, A.D., et al., *Successfully treated but not fit for purpose: paying attention to chronic lung impairment after TB treatment*. *The International Journal of Tuberculosis and Lung Disease*, 2016. **20**(8): p. 1010-1014.
- 472 5. van Kampen, S.C., et al., *International research and guidelines on post-tuberculosis chronic lung disorders: a systematic scoping review*. *BMJ Global Health*, 2018. **3**(4): p. e000745.
- 473 6. Chakaya, J., B. Kirenga, and H. Getahun, *Long term complications after completion of pulmonary tuberculosis treatment: A quest for a public health approach*. *Journal of Clinical Tuberculosis and Other Mycobacterial Diseases*, 2016. **3**: p. 10-12.
- 474 7. Nici, L., et al., *American thoracic society/European respiratory society statement on pulmonary rehabilitation*. *American journal of respiratory and critical care medicine*, 2006. **173**(12): p. 1390-1413.
- 475 8. Allwood, B., et al., *Post-tuberculosis lung health: perspectives from the First International Symposium*. 2020. **24**(8): p. 820-828.
- 476 9. Visca, D., et al., *Post-tuberculosis sequelae: the need to look beyond treatment outcome*. 2020. **24**(8): p. 761-762.
- 477 10. Lacasse, Y., et al., *Meta-analysis of respiratory rehabilitation in chronic obstructive pulmonary disease. A Cochrane systematic review*. 2007.
- 478 11. McCarthy, B., et al., *Pulmonary rehabilitation for chronic obstructive pulmonary disease*. *Cochrane database of systematic reviews*, 2015(2).
- 479 12. Bolton, C.E., et al., *British Thoracic Society guideline on pulmonary rehabilitation in adults: accredited by NICE*. *Thorax*, 2013. **68**(Suppl 2): p. ii1-ii30.
- 480 13. Spruit, M.A., et al., *An official American Thoracic Society/European Respiratory Society statement: key concepts and advances in pulmonary rehabilitation*. *American journal of respiratory and critical care medicine*, 2013. **188**(8): p. e13-e64.
- 481 14. Jones, R., et al., *A pre-post intervention study of pulmonary rehabilitation for adults with post-tuberculosis lung disease in Uganda*. *International Journal of Chronic Obstructive Pulmonary Disease*, 2017. **12**: p. 3533.
- 482 15. Jones, R., et al., *A development study of pulmonary rehabilitation for patients with chronic lung disease in Uganda*. 2016, Eur Respiratory Soc.
- 483 16. Orme, M.W., M. Orme, and R.J.J.o.G.H. Free, *Global RECHARGE: Establishing a standard international data set for pulmonary rehabilitation in low-and middle-income countries*. 2020. **10**(2).
- 484 17. Graham, B.L., et al., *Standardization of spirometry 2019 update. An official American thoracic society and European respiratory society technical statement*. 2019. **200**(8): p. e70-e88.
- 485 18. Evans, R.A. and S.J. Singh, *Minimum important difference of the incremental shuttle walk test distance in patients with COPD*. *Thorax*, 2019. **74**(10): p. 994.
- 486 19. GOLD, *Global strategy for the diagnosis, management, and prevention of chronic obstructive pulmonary disease, 2020 report*. 2020.
- 487 20. Powers, S.K., S.L. Dodd, and E.M. Jackson, *Total fitness & wellness*. 2013: Pearson Higher Ed.
- 488 21. Borg, G., *Perceived exertion as an indicator of somatic stress*. *Scandinavian journal of rehabilitation medicine*, 1970.
- 489 22. Borg, G.A., *Psychophysical bases of perceived exertion*. *Medicine & science in sports & exercise*, 1982.

- 1  
2  
3 514 23. Revill, S., et al., *The endurance shuttle walk: a new field test for the assessment of endurance*  
4 515 *capacity in chronic obstructive pulmonary disease*. Thorax, 1999. **54**(3): p. 213-222.
- 5 516 24. Singh, S.J., et al., *Minimum clinically important improvement for the incremental shuttle*  
6 517 *walking test*. Thorax, 2008. **63**(9): p. 775.
- 7 518 25. Singh, S.J., et al., *Development of a shuttle walking test of disability in patients with chronic*  
8 519 *airways obstruction*. Thorax, 1992. **47**(12): p. 1019-1024.
- 9 520 26. Van der Molen, T., et al., *Development, validity and responsiveness of the Clinical COPD*  
10 521 *Questionnaire*. Health and quality of life outcomes, 2003. **1**(1): p. 13.
- 11 522 27. Kon, S.S., et al., *The Clinical COPD Questionnaire: response to pulmonary rehabilitation and*  
12 523 *minimal clinically important difference*. Thorax, 2014. **69**(9): p. 793-798.
- 13 524 28. Jones, P., et al., *Development and first validation of the COPD Assessment Test*. European  
14 525 *Respiratory Journal*, 2009. **34**(3): p. 648-654.
- 15 526 29. Kon, S.S., et al., *Minimum clinically important difference for the COPD Assessment Test: a*  
16 527 *prospective analysis*. The Lancet Respiratory Medicine, 2014. **2**(3): p. 195-203.
- 17 528 30. Nowak, C., et al., *Accuracy of the hospital anxiety and depression scale for identifying*  
18 529 *depression in chronic obstructive pulmonary disease patients*. Pulmonary medicine, 2014.  
19 530 **2014**.
- 20 531 31. Smid, D.E., et al., *Responsiveness and MCID estimates for CAT, CCQ, and HADS in patients*  
21 532 *with COPD undergoing pulmonary rehabilitation: a prospective analysis*. Journal of the  
22 533 *American Medical Directors Association*, 2017. **18**(1): p. 53-58.
- 23 534 32. Wynne, S., et al., *The Hospital Anxiety and Depression Scale (HADS) in Bronchiectasis:*  
24 535 *Response to pulmonary rehabilitation (PR) and Minimum Clinically Important Difference*  
25 536 *(MCID)*. 2019, Eur Respiratory Soc.
- 26 537 33. Kroenke, K. and R.L. Spitzer, *The PHQ-9: a new depression diagnostic and severity measure*.  
27 538 *Psychiatric annals*, 2002. **32**(9): p. 509-515.
- 28 539 34. Löwe, B., et al., *Monitoring depression treatment outcomes with the patient health*  
29 540 *questionnaire-9*. Medical care, 2004: p. 1194-1201.
- 30 541 35. Reilly, M.C., A.S. Zbrozek, and E.M. Dukes, *The validity and reproducibility of a work*  
31 542 *productivity and activity impairment instrument*. Pharmacoeconomics, 1993. **4**(5): p. 353-  
32 543 365.
- 33 544 36. Group, T.E., *EuroQol-a new facility for the measurement of health-related quality of life*.  
34 545 *Health policy*, 1990. **16**(3): p. 199-208.
- 35 546 37. Nolan, C.M., et al., *The EQ-5D-5L health status questionnaire in COPD: validity,*  
36 547 *responsiveness and minimum important difference*. Thorax, 2016. **71**(6): p. 493-500.
- 37 548 38. Bohannon, R.W., *Sit-to-stand test for measuring performance of lower extremity muscles*.  
38 549 *Perceptual and motor skills*, 1995. **80**(1): p. 163-166.
- 39 550 39. Jones, S.E., et al., *The five-repetition sit-to-stand test as a functional outcome measure in*  
40 551 *COPD*. Thorax, 2013. **68**(11): p. 1015-1020.
- 41 552 40. Stenton, C., *The MRC breathlessness scale*. Occupational Medicine, 2008. **58**(3): p. 226-227.
- 42 553 41. De Torres, J.P., et al., *Power of outcome measurements to detect clinically significant*  
43 554 *changes in pulmonary rehabilitation of patients with COPD*. Chest, 2002. **121**(4): p. 1092-  
44 555 1098.
- 45 556 42. Crisafulli, E. and E.M. Clini, *Measures of dyspnea in pulmonary rehabilitation*.  
46 557 *Multidisciplinary respiratory medicine*, 2010. **5**(3): p. 202.
- 47 558 43. Zatloukal, J., et al., *The minimal important difference for the endurance shuttle walk test in*  
48 559 *individuals with chronic obstructive pulmonary disease following a course of pulmonary*  
49 560 *rehabilitation*. Chronic Respiratory Disease, 2019. **16**: p. 1479973119853828.
- 50 561 44. Bassett, D.R. and D. John, *Use of pedometers and accelerometers in clinical populations:*  
51 562 *validity and reliability issues*. Physical therapy reviews, 2010. **15**(3): p. 135-142.
- 52 563 45. Lucas, A.O. and H.M. Gilles, *Short textbook of public health medicine for the tropics. Chapter-*  
53 564 *Approaches to economic evaluation*. 2003: CRC Press.

1  
2  
3  
4  
5  
6  
7  
8  
9  
10  
11  
12  
13  
14  
15  
16  
17  
18  
19  
20  
21  
22  
23  
24  
25  
26  
27  
28  
29  
30  
31  
32  
33  
34  
35  
36  
37  
38  
39  
40  
41  
42  
43  
44  
45  
46  
47  
48  
49  
50  
51  
52  
53  
54  
55  
56  
57  
58  
59  
60

565 46. Harris, P.A., et al., *Research electronic data capture (REDCap)—a metadata-driven*  
566 *methodology and workflow process for providing translational research informatics support.*  
567 *Journal of biomedical informatics*, 2009. **42**(2): p. 377-381.  
568 47. Harris, P.A., et al., *The REDCap consortium: Building an international community of software*  
569 *platform partners.* *Journal of biomedical informatics*, 2019. **95**: p. 103208.

570

For peer review only

Table 1: The table shows the assessment and follow up schedule

| Observation/Investigation             | Screening/<br>Baseline<br>assessments | Randomisation | 12 weeks of study participation |                                           |
|---------------------------------------|---------------------------------------|---------------|---------------------------------|-------------------------------------------|
|                                       |                                       |               | Hospital based Pulmonary Rehab  | Follow-up phase of homebased<br>exercises |
|                                       |                                       |               | End of 6 weeks of PR            | End of 6 weeks of home exercises          |
| Written informed consent              | X                                     | X             |                                 |                                           |
| Demographics                          | X                                     | X             |                                 |                                           |
| Medical history                       | X                                     | X             |                                 |                                           |
| Clinical exam                         | X                                     | X             |                                 |                                           |
| Chest X-ray                           | X                                     |               |                                 |                                           |
| Spirometry                            |                                       | X             |                                 |                                           |
| MRC dyspnoea grade                    | X                                     |               | X                               | X                                         |
| Assess symptoms                       | X                                     |               | X                               | X                                         |
| Incremental Shuttle Walk Test         | X                                     |               | X                               | X                                         |
| Endurance Shuttle Walk Test           | X                                     |               | X                               | X                                         |
| Borg breathlessness scale             | X                                     |               | X                               | X                                         |
| Mid Upper Arm Circumference           | X                                     |               | X                               | X                                         |
| Sit-to-stand time                     | X                                     |               | X                               | X                                         |
| COPD Assessment Test                  |                                       | X             | X                               | X                                         |
| Clinical COPD Questionnaire           |                                       | X             | X                               | X                                         |
| Patient Health Questionnaire          |                                       | X             | X                               | X                                         |
| HADS                                  |                                       | X             | X                               | X                                         |
| WPAI                                  |                                       | X             | X                               | X                                         |
| Physical Activity (Actigraph monitor) |                                       | X             | X                               | X                                         |
| Cost/Benefit Analysis                 |                                       | X             | X                               | X                                         |
| EQ-5D-5L Questionnaire                |                                       | X             | X                               | X                                         |

1  
2  
3  
4  
5  
6  
7  
8  
9  
10  
11  
12  
13  
14  
15  
16  
17  
18  
19  
20  
21  
22  
23  
24  
25  
26  
27  
28  
29  
30  
31  
32  
33  
34  
35  
36  
37  
38  
39  
40  
41  
42  
43  
44  
45  
46  
47  
48  
49  
50  
51  
52  
53  
54  
55  
56  
57  
58  
59  
60

For peer review only

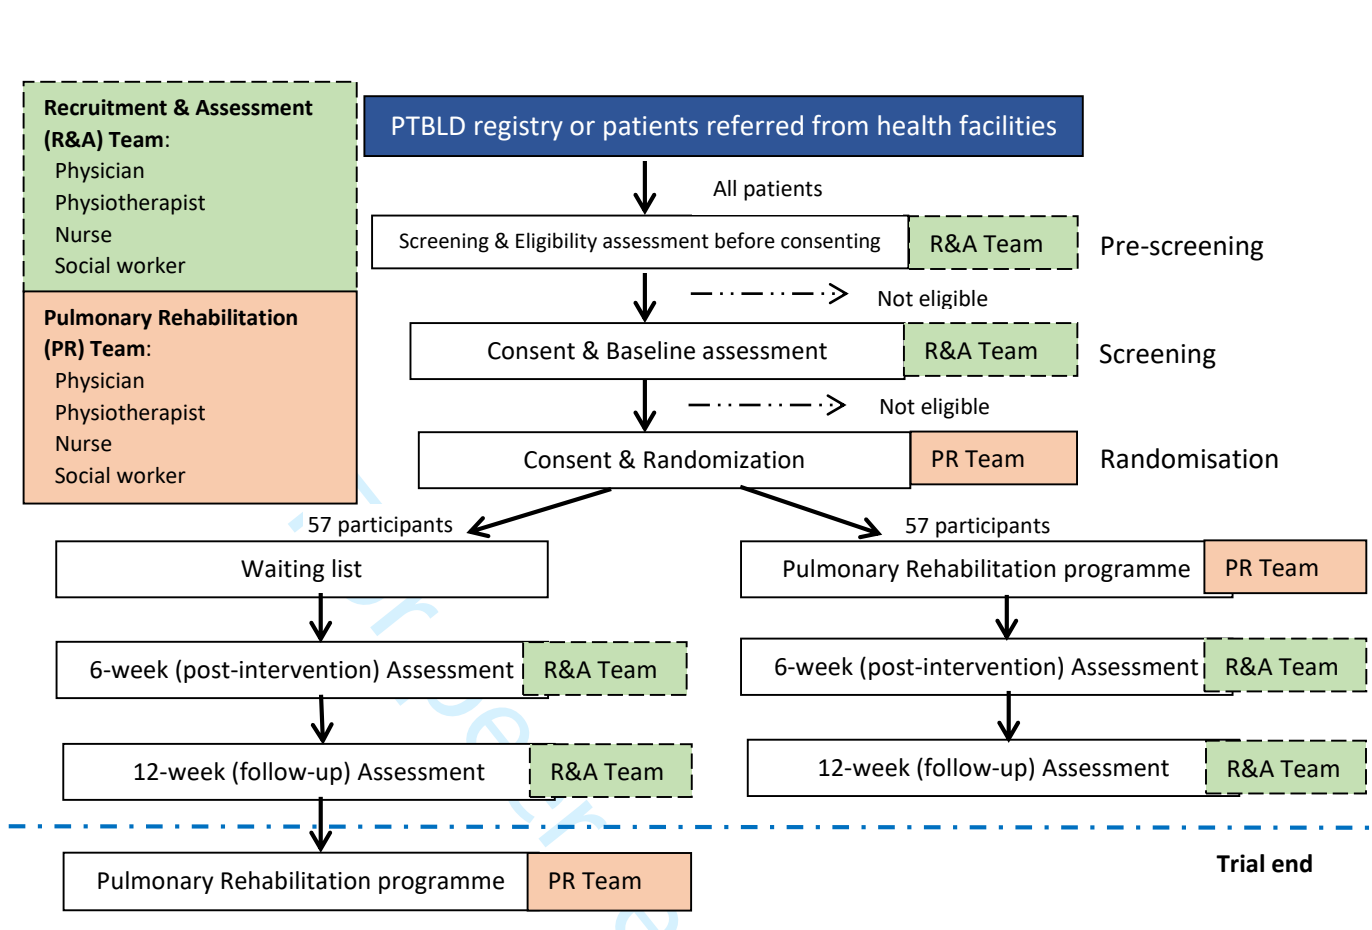

Figure 1: Figure showing the study flow in the Post TB Pulmonary Rehabilitation trial

**Legend:** PTBLD-post-TB lung disease; PR – Pulmonary Rehabilitation; R&A – Recruitment and Assessment

**Supplementary Table 1: A list of warm up and cool down activities during PR session**

1. Marching on the spot, slowly bringing the feet off the floor for up to 1 minute
2. Heel digs: alternate heel digs in front of the body with toes pointing to the ceiling, add in a biceps curl (repeat 10-12 times).
3. Toe taps: Tap the toes to the floor in front of alternating legs at a comfortable distance. Heels stay off the ground (repeat 10-12 times).
4. High knee marching – with opposite hand to opposite knee.
5. Side bends: With arms relaxed by your side, leaning over to the right for 8 to 10 seconds and back to centre, then lean to the left for 8 to 10 seconds and back to the centre (repeat 8 times).
6. Arms stretched up, forwards and down.
7. Alternate punching of arms forward.
8. Seated or standing side taps to the floor with the foot – alternate legs.
9. Seated or standing in upright posture, feet placed shoulder breadth apart – shoulder roll in both directions (clockwise and anti-clockwise).
10. Seated or standing in upright posture, feet placed shoulder breath apart, elbows bent with hands onto shoulder – elbows make circles in clockwise and anti-clockwise.
11. Hamstring stretch: With right leg straight, place it in front of the body, heel pushed into the floor with toes pointing toward the ceiling. Slightly bend the left knee, place hands on the straight right leg and gently lean forward. Hold the stretch for 10-15 seconds then return to upright position. Repeat on left leg.
12. Quadriceps stretch: While holding a chair or onto a wall, stand on your left leg and grab your right foot using your right hand, pulling it gently towards the ceiling. Hold the position for 10-15 seconds and return to upright position and repeat on the right leg.

PR – Pulmonary Rehabilitation



**Supplementary Table 2: Physical activity data collection and accelerometry processing criteria**

| Criteria                                   | Details                                                                                                                                                                                                                                |
|--------------------------------------------|----------------------------------------------------------------------------------------------------------------------------------------------------------------------------------------------------------------------------------------|
| <b>Accelerometer Model</b>                 | ActiGraph wGT3X-BT (version 6.13.4; firmware 1.9.2)                                                                                                                                                                                    |
| <b>Serial number range</b>                 | Twenty unique devices will be used; ranging from MOS2E09190617 to MOS2E25190750 and averaging six deployments per device (same serial used for baseline and follow-up wear periods to remove any inter-device variability)             |
| <b>Piezosensor orientation</b>             | Triaxial                                                                                                                                                                                                                               |
| <b>Mode setup</b>                          | Mode 29 (x, y, z, steps, lux)                                                                                                                                                                                                          |
| <b>Original sample rate</b>                | 100 Hz (.gt3x file format)                                                                                                                                                                                                             |
| <b>Deployment method</b>                   | Baseline:<br>Fitted by research team on Day 0 (Baseline PR Assessment)<br>Fitted by participant on Day 1<br>Follow-up:<br>Fitted by research team Day 0 (11 <sup>th</sup> /12 <sup>th</sup> session)<br>Fitted by participant on Day 1 |
| <b>Location worn</b>                       | Anterior hip adjacent to the mid-line of the thigh                                                                                                                                                                                     |
| <b>Requested days of wear</b>              | 7 days of free-living (10,080 epochs)                                                                                                                                                                                                  |
| <b>Initialization</b>                      | Not deployed in delay mode in order to standardised capture of Day 0 (00:00) with stop time based on date of first PR class (baseline) and date of follow-up assessment                                                                |
| <b>Wear instructions</b>                   | Wear continuously except for sleep and water-based activities                                                                                                                                                                          |
| <b>Non-wear appropriation</b>              | ≥60 min of consecutive 0s with allowance for 2 minutes of interruptions                                                                                                                                                                |
| <b>Valid day criteria</b>                  | ≥8 hours of valid waking wear time                                                                                                                                                                                                     |
| <b>Valid file</b>                          | ≥4 valid days for each of the two time points                                                                                                                                                                                          |
| <b>Missing data</b>                        | Data modelling or imputation will not be performed                                                                                                                                                                                     |
| <b>Epoch length</b>                        | 60 seconds                                                                                                                                                                                                                             |
| <b>Intensity classification (absolute)</b> | Uniaxial (x-axis) intensity cut-points as follows: Stationary <100 cpm; Light 100-2019 cpm; Moderate 2020-5998cpm; Vigorous ≥5999cpm (Moderate-to-vigorous ≥2020 cpm)                                                                  |
| <b>Intensity classification (relative)</b> | Uniaxial (x-axis) cut-points based on Endurance Shuttle Walk Test performance                                                                                                                                                          |

PR – Pulmonary Rehabilitation

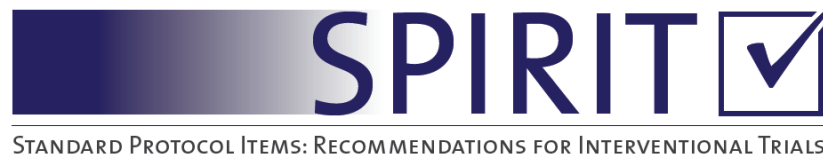

SPIRIT 2013 Checklist: Recommended items to address in a clinical trial protocol and related documents\*

| Section/item                      | Item No | Description                                                                                                                                                                                                                                                                              | Addressed on page number |
|-----------------------------------|---------|------------------------------------------------------------------------------------------------------------------------------------------------------------------------------------------------------------------------------------------------------------------------------------------|--------------------------|
| <b>Administrative information</b> |         |                                                                                                                                                                                                                                                                                          |                          |
| Title                             | 1       | Descriptive title identifying the study design, population, interventions, and, if applicable, trial acronym                                                                                                                                                                             | <u>1</u>                 |
| Trial registration                | 2a      | Trial identifier and registry name. If not yet registered, name of intended registry                                                                                                                                                                                                     | <u>3</u>                 |
|                                   | 2b      | All items from the World Health Organization Trial Registration Data Set                                                                                                                                                                                                                 | <u>N/A</u>               |
| Protocol version                  | 3       | Date and version identifier                                                                                                                                                                                                                                                              | <u>1</u>                 |
| Funding                           | 4       | Sources and types of financial, material, and other support                                                                                                                                                                                                                              | <u>1,16</u>              |
| Roles and responsibilities        | 5a      | Names, affiliations, and roles of protocol contributors                                                                                                                                                                                                                                  | <u>1</u>                 |
|                                   | 5b      | Name and contact information for the trial sponsor                                                                                                                                                                                                                                       | <u>1,16</u>              |
|                                   | 5c      | Role of study sponsor and funders, if any, in study design; collection, management, analysis, and interpretation of data; writing of the report; and the decision to submit the report for publication, including whether they will have ultimate authority over any of these activities | <u>N/A</u>               |
|                                   | 5d      | Composition, roles, and responsibilities of the coordinating centre, steering committee, endpoint adjudication committee, data management team, and other individuals or groups overseeing the trial, if applicable (see Item 21a for data monitoring committee)                         | <u>14</u>                |

**Introduction**

|    |                                                           |     |                                                                                                                                                                                                           |               |
|----|-----------------------------------------------------------|-----|-----------------------------------------------------------------------------------------------------------------------------------------------------------------------------------------------------------|---------------|
| 1  | Background and rationale                                  | 6a  | Description of research question and justification for undertaking the trial, including summary of relevant studies (published and unpublished) examining benefits and harms for each intervention        | <u>4</u>      |
| 2  |                                                           |     |                                                                                                                                                                                                           |               |
| 3  |                                                           |     |                                                                                                                                                                                                           |               |
| 4  |                                                           |     |                                                                                                                                                                                                           |               |
| 5  |                                                           | 6b  | Explanation for choice of comparators                                                                                                                                                                     | <u>6,7,8</u>  |
| 6  |                                                           |     |                                                                                                                                                                                                           |               |
| 7  | Objectives                                                | 7   | Specific objectives or hypotheses                                                                                                                                                                         | <u>4</u>      |
| 8  |                                                           |     |                                                                                                                                                                                                           |               |
| 9  | Trial design                                              | 8   | Description of trial design including type of trial (eg, parallel group, crossover, factorial, single group), allocation ratio, and framework (eg, superiority, equivalence, noninferiority, exploratory) | <u>4</u>      |
| 10 |                                                           |     |                                                                                                                                                                                                           |               |
| 11 |                                                           |     |                                                                                                                                                                                                           |               |
| 12 |                                                           |     |                                                                                                                                                                                                           |               |
| 13 |                                                           |     |                                                                                                                                                                                                           |               |
| 14 |                                                           |     |                                                                                                                                                                                                           |               |
| 15 | <b>Methods: Participants, interventions, and outcomes</b> |     |                                                                                                                                                                                                           |               |
| 16 |                                                           |     |                                                                                                                                                                                                           |               |
| 17 | Study setting                                             | 9   | Description of study settings (eg, community clinic, academic hospital) and list of countries where data will be collected. Reference to where list of study sites can be obtained                        | <u>5</u>      |
| 18 |                                                           |     |                                                                                                                                                                                                           |               |
| 19 |                                                           |     |                                                                                                                                                                                                           |               |
| 20 |                                                           |     |                                                                                                                                                                                                           |               |
| 21 | Eligibility criteria                                      | 10  | Inclusion and exclusion criteria for participants. If applicable, eligibility criteria for study centres and individuals who will perform the interventions (eg, surgeons, psychotherapists)              | <u>5,6</u>    |
| 22 |                                                           |     |                                                                                                                                                                                                           |               |
| 23 |                                                           |     |                                                                                                                                                                                                           |               |
| 24 |                                                           |     |                                                                                                                                                                                                           |               |
| 25 |                                                           |     |                                                                                                                                                                                                           |               |
| 26 | Interventions                                             | 11a | Interventions for each group with sufficient detail to allow replication, including how and when they will be administered                                                                                | <u>8,9</u>    |
| 27 |                                                           |     |                                                                                                                                                                                                           |               |
| 28 |                                                           |     |                                                                                                                                                                                                           |               |
| 29 |                                                           | 11b | Criteria for discontinuing or modifying allocated interventions for a given trial participant (eg, drug dose change in response to harms, participant request, or improving/worsening disease)            | <u>N/A</u>    |
| 30 |                                                           |     |                                                                                                                                                                                                           |               |
| 31 |                                                           |     |                                                                                                                                                                                                           |               |
| 32 |                                                           |     |                                                                                                                                                                                                           |               |
| 33 |                                                           |     |                                                                                                                                                                                                           |               |
| 34 |                                                           | 11c | Strategies to improve adherence to intervention protocols, and any procedures for monitoring adherence (eg, drug tablet return, laboratory tests)                                                         | <u>8,9,10</u> |
| 35 |                                                           |     |                                                                                                                                                                                                           |               |
| 36 |                                                           |     |                                                                                                                                                                                                           |               |
| 37 |                                                           | 11d | Relevant concomitant care and interventions that are permitted or prohibited during the trial                                                                                                             | <u>N/A</u>    |
| 38 |                                                           |     |                                                                                                                                                                                                           |               |
| 39 |                                                           |     |                                                                                                                                                                                                           |               |
| 40 |                                                           |     |                                                                                                                                                                                                           |               |
| 41 |                                                           |     |                                                                                                                                                                                                           |               |
| 42 |                                                           |     |                                                                                                                                                                                                           |               |
| 43 |                                                           |     |                                                                                                                                                                                                           |               |
| 44 |                                                           |     |                                                                                                                                                                                                           |               |
| 45 |                                                           |     |                                                                                                                                                                                                           |               |
| 46 |                                                           |     |                                                                                                                                                                                                           |               |

|    |                                                                     |     |                                                                                                                                                                                                                                                                                                                                                                                |                 |
|----|---------------------------------------------------------------------|-----|--------------------------------------------------------------------------------------------------------------------------------------------------------------------------------------------------------------------------------------------------------------------------------------------------------------------------------------------------------------------------------|-----------------|
| 1  | Outcomes                                                            | 12  | Primary, secondary, and other outcomes, including the specific measurement variable (eg, systolic blood pressure), analysis metric (eg, change from baseline, final value, time to event), method of aggregation (eg, median, proportion), and time point for each outcome. Explanation of the clinical relevance of chosen efficacy and harm outcomes is strongly recommended | <u>10,11,12</u> |
| 2  |                                                                     |     |                                                                                                                                                                                                                                                                                                                                                                                |                 |
| 3  |                                                                     |     |                                                                                                                                                                                                                                                                                                                                                                                |                 |
| 4  |                                                                     |     |                                                                                                                                                                                                                                                                                                                                                                                |                 |
| 5  |                                                                     |     |                                                                                                                                                                                                                                                                                                                                                                                |                 |
| 6  |                                                                     |     |                                                                                                                                                                                                                                                                                                                                                                                |                 |
| 7  | Participant timeline                                                | 13  | Time schedule of enrolment, interventions (including any run-ins and washouts), assessments, and visits for participants. A schematic diagram is highly recommended (see Figure)                                                                                                                                                                                               | <u>7,20</u>     |
| 8  |                                                                     |     |                                                                                                                                                                                                                                                                                                                                                                                |                 |
| 9  |                                                                     |     |                                                                                                                                                                                                                                                                                                                                                                                |                 |
| 10 |                                                                     |     |                                                                                                                                                                                                                                                                                                                                                                                |                 |
| 11 |                                                                     |     |                                                                                                                                                                                                                                                                                                                                                                                |                 |
| 12 | Sample size                                                         | 14  | Estimated number of participants needed to achieve study objectives and how it was determined, including clinical and statistical assumptions supporting any sample size calculations                                                                                                                                                                                          | <u>7</u>        |
| 13 |                                                                     |     |                                                                                                                                                                                                                                                                                                                                                                                |                 |
| 14 |                                                                     |     |                                                                                                                                                                                                                                                                                                                                                                                |                 |
| 15 |                                                                     |     |                                                                                                                                                                                                                                                                                                                                                                                |                 |
| 16 | Recruitment                                                         | 15  | Strategies for achieving adequate participant enrolment to reach target sample size                                                                                                                                                                                                                                                                                            | <u>5</u>        |
| 17 |                                                                     |     |                                                                                                                                                                                                                                                                                                                                                                                |                 |
| 18 | <b>Methods: Assignment of interventions (for controlled trials)</b> |     |                                                                                                                                                                                                                                                                                                                                                                                |                 |
| 19 | <b>Allocation:</b>                                                  |     |                                                                                                                                                                                                                                                                                                                                                                                |                 |
| 20 |                                                                     |     |                                                                                                                                                                                                                                                                                                                                                                                |                 |
| 21 | Sequence generation                                                 | 16a | Method of generating the allocation sequence (eg, computer-generated random numbers), and list of any factors for stratification. To reduce predictability of a random sequence, details of any planned restriction (eg, blocking) should be provided in a separate document that is unavailable to those who enrol participants or assign interventions                       | <u>6</u>        |
| 22 |                                                                     |     |                                                                                                                                                                                                                                                                                                                                                                                |                 |
| 23 |                                                                     |     |                                                                                                                                                                                                                                                                                                                                                                                |                 |
| 24 |                                                                     |     |                                                                                                                                                                                                                                                                                                                                                                                |                 |
| 25 |                                                                     |     |                                                                                                                                                                                                                                                                                                                                                                                |                 |
| 26 |                                                                     |     |                                                                                                                                                                                                                                                                                                                                                                                |                 |
| 27 |                                                                     |     |                                                                                                                                                                                                                                                                                                                                                                                |                 |
| 28 |                                                                     |     |                                                                                                                                                                                                                                                                                                                                                                                |                 |
| 29 | Allocation concealment mechanism                                    | 16b | Mechanism of implementing the allocation sequence (eg, central telephone; sequentially numbered, opaque, sealed envelopes), describing any steps to conceal the sequence until interventions are assigned                                                                                                                                                                      | <u>6</u>        |
| 30 |                                                                     |     |                                                                                                                                                                                                                                                                                                                                                                                |                 |
| 31 |                                                                     |     |                                                                                                                                                                                                                                                                                                                                                                                |                 |
| 32 |                                                                     |     |                                                                                                                                                                                                                                                                                                                                                                                |                 |
| 33 |                                                                     |     |                                                                                                                                                                                                                                                                                                                                                                                |                 |
| 34 | Implementation                                                      | 16c | Who will generate the allocation sequence, who will enrol participants, and who will assign participants to interventions                                                                                                                                                                                                                                                      | <u>6</u>        |
| 35 |                                                                     |     |                                                                                                                                                                                                                                                                                                                                                                                |                 |
| 36 |                                                                     |     |                                                                                                                                                                                                                                                                                                                                                                                |                 |
| 37 | Blinding (masking)                                                  | 17a | Who will be blinded after assignment to interventions (eg, trial participants, care providers, outcome assessors, data analysts), and how                                                                                                                                                                                                                                      | <u>7</u>        |
| 38 |                                                                     |     |                                                                                                                                                                                                                                                                                                                                                                                |                 |
| 39 |                                                                     |     |                                                                                                                                                                                                                                                                                                                                                                                |                 |
| 40 |                                                                     |     |                                                                                                                                                                                                                                                                                                                                                                                |                 |
| 41 |                                                                     |     |                                                                                                                                                                                                                                                                                                                                                                                |                 |
| 42 |                                                                     |     |                                                                                                                                                                                                                                                                                                                                                                                |                 |
| 43 |                                                                     |     |                                                                                                                                                                                                                                                                                                                                                                                |                 |
| 44 |                                                                     |     |                                                                                                                                                                                                                                                                                                                                                                                |                 |
| 45 |                                                                     |     |                                                                                                                                                                                                                                                                                                                                                                                |                 |
| 46 |                                                                     |     |                                                                                                                                                                                                                                                                                                                                                                                |                 |

1 17b If blinded, circumstances under which unblinding is permissible, and procedure for  
 2 revealing a participant's allocated intervention during the trial N/A

3  
 4 **Methods: Data collection, management, and analysis**

5  
 6 Data collection methods 18a Plans for assessment and collection of outcome, baseline, and other trial data,  
 7 including any related processes to promote data quality (eg, duplicate measurements,  
 8 training of assessors) and a description of study instruments (eg, questionnaires,  
 9 laboratory tests) along with their reliability and validity, if known. Reference to where  
 10 data collection forms can be found, if not in the protocol 14

11  
 12  
 13 18b Plans to promote participant retention and complete follow-up, including list of any  
 14 outcome data to be collected for participants who discontinue or deviate from  
 15 intervention protocols 14

16  
 17 Data management 19 Plans for data entry, coding, security, and storage, including any related processes to  
 18 promote data quality (eg, double data entry; range checks for data values). Reference  
 19 to where details of data management procedures can be found, if not in the protocol 14

20  
 21 Statistical methods 20a Statistical methods for analysing primary and secondary outcomes. Reference to  
 22 where other details of the statistical analysis plan can be found, if not in the protocol 13,14

23  
 24 20b Methods for any additional analyses (eg, subgroup and adjusted analyses) N/A

25  
 26 20c Definition of analysis population relating to protocol non-adherence (eg, as  
 27 randomised analysis), and any statistical methods to handle missing data (eg,  
 28 multiple imputation) 13,14

29  
 30  
 31 **Methods: Monitoring**

32  
 33 Data monitoring 21a Composition of data monitoring committee (DMC); summary of its role and reporting  
 34 structure; statement of whether it is independent from the sponsor and competing  
 35 interests; and reference to where further details about its charter can be found, if not  
 36 in the protocol. Alternatively, an explanation of why a DMC is not needed 14

37  
 38 21b Description of any interim analyses and stopping guidelines, including who will have  
 39 access to these interim results and make the final decision to terminate the trial 14

|    |                                 |     |                                                                                                                                                                                                                                  |              |
|----|---------------------------------|-----|----------------------------------------------------------------------------------------------------------------------------------------------------------------------------------------------------------------------------------|--------------|
| 1  | Harms                           | 22  | Plans for collecting, assessing, reporting, and managing solicited and spontaneously reported adverse events and other unintended effects of trial interventions or trial conduct                                                | <u>14</u>    |
| 2  |                                 |     |                                                                                                                                                                                                                                  |              |
| 3  |                                 |     |                                                                                                                                                                                                                                  |              |
| 4  |                                 |     |                                                                                                                                                                                                                                  |              |
| 5  | Auditing                        | 23  | Frequency and procedures for auditing trial conduct, if any, and whether the process will be independent from investigators and the sponsor                                                                                      | <u>N/A</u>   |
| 6  |                                 |     |                                                                                                                                                                                                                                  |              |
| 7  |                                 |     |                                                                                                                                                                                                                                  |              |
| 8  |                                 |     |                                                                                                                                                                                                                                  |              |
| 9  | <b>Ethics and dissemination</b> |     |                                                                                                                                                                                                                                  |              |
| 10 |                                 |     |                                                                                                                                                                                                                                  |              |
| 11 | Research ethics approval        | 24  | Plans for seeking research ethics committee/institutional review board (REC/IRB) approval                                                                                                                                        | <u>14</u>    |
| 12 |                                 |     |                                                                                                                                                                                                                                  |              |
| 13 |                                 |     |                                                                                                                                                                                                                                  |              |
| 14 | Protocol amendments             | 25  | Plans for communicating important protocol modifications (eg, changes to eligibility criteria, outcomes, analyses) to relevant parties (eg, investigators, REC/IRBs, trial participants, trial registries, journals, regulators) | <u>N/A</u>   |
| 15 |                                 |     |                                                                                                                                                                                                                                  |              |
| 16 |                                 |     |                                                                                                                                                                                                                                  |              |
| 17 |                                 |     |                                                                                                                                                                                                                                  |              |
| 18 | Consent or assent               | 26a | Who will obtain informed consent or assent from potential trial participants or authorised surrogates, and how (see Item 32)                                                                                                     | <u>5</u>     |
| 19 |                                 |     |                                                                                                                                                                                                                                  |              |
| 20 |                                 |     |                                                                                                                                                                                                                                  |              |
| 21 |                                 |     |                                                                                                                                                                                                                                  |              |
| 22 |                                 | 26b | Additional consent provisions for collection and use of participant data and biological specimens in ancillary studies, if applicable                                                                                            | <u>N/A</u>   |
| 23 |                                 |     |                                                                                                                                                                                                                                  |              |
| 24 |                                 |     |                                                                                                                                                                                                                                  |              |
| 25 | Confidentiality                 | 27  | How personal information about potential and enrolled participants will be collected, shared, and maintained in order to protect confidentiality before, during, and after the trial                                             | <u>14,15</u> |
| 26 |                                 |     |                                                                                                                                                                                                                                  |              |
| 27 |                                 |     |                                                                                                                                                                                                                                  |              |
| 28 |                                 |     |                                                                                                                                                                                                                                  |              |
| 29 | Declaration of interests        | 28  | Financial and other competing interests for principal investigators for the overall trial and each study site                                                                                                                    | <u>16</u>    |
| 30 |                                 |     |                                                                                                                                                                                                                                  |              |
| 31 |                                 |     |                                                                                                                                                                                                                                  |              |
| 32 | Access to data                  | 29  | Statement of who will have access to the final trial dataset, and disclosure of contractual agreements that limit such access for investigators                                                                                  | <u>16</u>    |
| 33 |                                 |     |                                                                                                                                                                                                                                  |              |
| 34 |                                 |     |                                                                                                                                                                                                                                  |              |
| 35 |                                 |     |                                                                                                                                                                                                                                  |              |
| 36 | Ancillary and post-trial care   | 30  | Provisions, if any, for ancillary and post-trial care, and for compensation to those who suffer harm from trial participation                                                                                                    | <u>N/A</u>   |
| 37 |                                 |     |                                                                                                                                                                                                                                  |              |
| 38 |                                 |     |                                                                                                                                                                                                                                  |              |
| 39 |                                 |     |                                                                                                                                                                                                                                  |              |
| 40 |                                 |     |                                                                                                                                                                                                                                  |              |
| 41 |                                 |     |                                                                                                                                                                                                                                  |              |
| 42 |                                 |     |                                                                                                                                                                                                                                  |              |
| 43 |                                 |     |                                                                                                                                                                                                                                  |              |
| 44 |                                 |     |                                                                                                                                                                                                                                  |              |
| 45 |                                 |     |                                                                                                                                                                                                                                  |              |
| 46 |                                 |     |                                                                                                                                                                                                                                  |              |

|    |                            |     |                                                                                                                                                                                                                                                                                     |                 |
|----|----------------------------|-----|-------------------------------------------------------------------------------------------------------------------------------------------------------------------------------------------------------------------------------------------------------------------------------------|-----------------|
| 1  | Dissemination policy       | 31a | Plans for investigators and sponsor to communicate trial results to participants, healthcare professionals, the public, and other relevant groups (eg, via publication, reporting in results databases, or other data sharing arrangements), including any publication restrictions | <u>15</u>       |
| 2  |                            |     |                                                                                                                                                                                                                                                                                     |                 |
| 3  |                            |     |                                                                                                                                                                                                                                                                                     |                 |
| 4  |                            |     |                                                                                                                                                                                                                                                                                     |                 |
| 5  |                            |     |                                                                                                                                                                                                                                                                                     |                 |
| 6  |                            | 31b | Authorship eligibility guidelines and any intended use of professional writers                                                                                                                                                                                                      | <u>16</u>       |
| 7  |                            |     |                                                                                                                                                                                                                                                                                     |                 |
| 8  |                            | 31c | Plans, if any, for granting public access to the full protocol, participant-level dataset, and statistical code                                                                                                                                                                     | <u>16</u>       |
| 9  |                            |     |                                                                                                                                                                                                                                                                                     |                 |
| 10 |                            |     |                                                                                                                                                                                                                                                                                     |                 |
| 11 |                            |     |                                                                                                                                                                                                                                                                                     |                 |
| 12 | <b>Appendices</b>          |     |                                                                                                                                                                                                                                                                                     |                 |
| 13 |                            |     |                                                                                                                                                                                                                                                                                     |                 |
| 14 | Informed consent materials | 32  | Model consent form and other related documentation given to participants and authorised surrogates                                                                                                                                                                                  | <u>Attached</u> |
| 15 |                            |     |                                                                                                                                                                                                                                                                                     |                 |
| 16 |                            |     |                                                                                                                                                                                                                                                                                     |                 |
| 17 | Biological specimens       | 33  | Plans for collection, laboratory evaluation, and storage of biological specimens for genetic or molecular analysis in the current trial and for future use in ancillary studies, if applicable                                                                                      | <u>N/A</u>      |
| 18 |                            |     |                                                                                                                                                                                                                                                                                     |                 |
| 19 |                            |     |                                                                                                                                                                                                                                                                                     |                 |
| 20 |                            |     |                                                                                                                                                                                                                                                                                     |                 |

21 \*It is strongly recommended that this checklist be read in conjunction with the SPIRIT 2013 Explanation & Elaboration for important clarification on the items.  
 22 Amendments to the protocol should be tracked and dated. The SPIRIT checklist is copyrighted by the SPIRIT Group under the Creative Commons  
 23 "[Attribution-NonCommercial-NoDerivs 3.0 Unported](#)" license.  
 24
