# Supplementary material for: Study protocol for a randomised controlled trial assessing the impact of pulmonary rehabilitation on maximal exercise capacity for adults living with post-TB lung disease: Global RECHARGE Uganda
Source: BMJ Open. 2021 Aug 10;11(8):e047641. doi: 10.1136/bmjopen-2020-047641 (PMC8356159; doi:10.1136/bmjopen-2020-047641)
Supplement: Supplementary data [file bmjopen-2020-047641supp002.pdf]

**Supplementary Table 2: Physical activity data collection and accelerometry processing criteria**

| Criteria                                   | Details                                                                                                                                                                                                                                |
|--------------------------------------------|----------------------------------------------------------------------------------------------------------------------------------------------------------------------------------------------------------------------------------------|
| <b>Accelerometer Model</b>                 | ActiGraph wGT3X-BT (version 6.13.4; firmware 1.9.2)                                                                                                                                                                                    |
| <b>Serial number range</b>                 | Twenty unique devices will be used; ranging from MOS2E09190617 to MOS2E25190750 and averaging six deployments per device (same serial used for baseline and follow-up wear periods to remove any inter-device variability)             |
| <b>Piezosensor orientation</b>             | Triaxial                                                                                                                                                                                                                               |
| <b>Mode setup</b>                          | Mode 29 (x, y, z, steps, lux)                                                                                                                                                                                                          |
| <b>Original sample rate</b>                | 100 Hz (.gt3x file format)                                                                                                                                                                                                             |
| <b>Deployment method</b>                   | Baseline:<br>Fitted by research team on Day 0 (Baseline PR Assessment)<br>Fitted by participant on Day 1<br>Follow-up:<br>Fitted by research team Day 0 (11 <sup>th</sup> /12 <sup>th</sup> session)<br>Fitted by participant on Day 1 |
| <b>Location worn</b>                       | Anterior hip adjacent to the mid-line of the thigh                                                                                                                                                                                     |
| <b>Requested days of wear</b>              | 7 days of free-living (10,080 epochs)                                                                                                                                                                                                  |
| <b>Initialization</b>                      | Not deployed in delay mode in order to standardised capture of Day 0 (00:00) with stop time based on date of first PR class (baseline) and date of follow-up assessment                                                                |
| <b>Wear instructions</b>                   | Wear continuously except for sleep and water-based activities                                                                                                                                                                          |
| <b>Non-wear appropriation</b>              | ≥60 min of consecutive 0s with allowance for 2 minutes of interruptions                                                                                                                                                                |
| <b>Valid day criteria</b>                  | ≥8 hours of valid waking wear time                                                                                                                                                                                                     |
| <b>Valid file</b>                          | ≥4 valid days for each of the two time points                                                                                                                                                                                          |
| <b>Missing data</b>                        | Data modelling or imputation will not be performed                                                                                                                                                                                     |
| <b>Epoch length</b>                        | 60 seconds                                                                                                                                                                                                                             |
| <b>Intensity classification (absolute)</b> | Uniaxial (x-axis) intensity cut-points as follows: Stationary <100 cpm; Light 100-2019 cpm; Moderate 2020-5998cpm; Vigorous ≥5999cpm (Moderate-to-vigorous ≥2020 cpm)                                                                  |
| <b>Intensity classification (relative)</b> | Uniaxial (x-axis) cut-points based on Endurance Shuttle Walk Test performance                                                                                                                                                          |

PR – Pulmonary Rehabilitation
